# Supplementary material for: Implications of ethylene biosynthesis and signaling in soybean drought stress tolerance
Source: PubMed Central journal article supplement (PMC4557918; doi:10.1186/s12870-015-0597-z), 2015-09-03
Supplement: 12870_2015_597_MOESM2_ESM.pdf [file 12870_2015_597_MOESM2_ESM.pdf]

**Table S1. Arabidopsis thaliana Ethylene Biosynthesis Protein List**

| Arabidopsis thaliana Protein |           |                   | Protein Domain |                                      |           | Pathway                            |
|------------------------------|-----------|-------------------|----------------|--------------------------------------|-----------|------------------------------------|
| Generic Name                 | Locus ID  | Size <sup>1</sup> | PFAM Code      | Description                          | Position  |                                    |
| AtAAT                        | At1g77670 | 440               | PF00155        | Aminotransferase class I and II      | 079 - 432 | Yang Cycle                         |
| AtACD1                       | At1g48420 | 401               | PF00291        | Pyridoxal-phosphate dependent enzyme | 054 - 363 | ACC Degradation                    |
| AtACO1                       | At2g19590 | 310               | PF03171        | 2OG-Fe(II) oxygenase superfamily     | 158 - 259 | Ethylene Biosynthesis              |
| AtACO2                       | At1g62380 | 320               | PF03171        | 2OG-Fe(II) oxygenase superfamily     | 156 - 256 | Ethylene Biosynthesis              |
| AtACO4                       | At1g05010 | 323               | PF03171        | 2OG-Fe(II) oxygenase superfamily     | 153 - 254 | Ethylene Biosynthesis              |
| AtACO#001                    | At1g12010 | 320               | PF03171        | 2OG-Fe(II) oxygenase superfamily     | 156 - 256 | Ethylene Biosynthesis              |
| AtACO#002                    | At1g77330 | 307               | PF03171        | 2OG-Fe(II) oxygenase superfamily     | 156 - 256 | Ethylene Biosynthesis              |
| AtACS1                       | At3g61510 | 488               | PF00155        | Aminotransferase class I and II      | 047 - 425 | Ethylene Biosynthesis              |
| AtACS2                       | At1g01480 | 496               | PF00155        | Aminotransferase class I and II      | 048 - 432 | Ethylene Biosynthesis              |
| AtACS4                       | At2g22810 | 474               | PF00155        | Aminotransferase class I and II      | 040 - 425 | Ethylene Biosynthesis              |
| AtACS5                       | At5g65800 | 470               | PF00155        | Aminotransferase class I and II      | 040 - 424 | Ethylene Biosynthesis              |
| AtACS6                       | At4g11280 | 495               | PF00155        | Aminotransferase class I and II      | 051 - 432 | Ethylene Biosynthesis              |
| AtACS7                       | At4g26200 | 447               | PF00155        | Aminotransferase class I and II      | 054 - 437 | Ethylene Biosynthesis              |
| AtACS8                       | At4g37770 | 469               | PF00155        | Aminotransferase class I and II      | 040 - 424 | Ethylene Biosynthesis              |
| AtACS9                       | At3g49700 | 470               | PF00155        | Aminotransferase class I and II      | 040 - 424 | Ethylene Biosynthesis              |
| AtACS10                      | At1g62960 | 557               | PF00155        | Aminotransferase class I and II      | 169 - 546 | Ethylene Biosynthesis <sup>2</sup> |
| AtACS11                      | At4g08040 | 460               | PF00155        | Aminotransferase class I and II      | 038 - 419 | Ethylene Biosynthesis              |
| AtACS12                      | At5g51690 | 495               | PF00155        | Aminotransferase class I and II      | 105 - 486 | Ethylene Biosynthesis <sup>2</sup> |
| AtACT#001                    | At1g03940 | 469               | PF02458        | Transferase family                   | 003 - 463 | MACC Synthesis <sup>3</sup>        |
| AtACT#002                    | At1g03495 | 465               | PF02458        | Transferase family                   | 006 - 459 | MACC Synthesis <sup>3</sup>        |
| AtACT#003                    | At2g30200 | 393               | PF02458        | Transferase family                   | 091 - 390 | MACC Synthesis <sup>3</sup>        |
| AtACT#004                    | At3g29670 | 451               | PF02458        | Transferase family                   | 001 - 448 | MACC Synthesis <sup>3</sup>        |
| AtACT#005                    | At5g39050 | 469               | PF02458        | Transferase family                   | 008 - 466 | MACC Synthesis <sup>3</sup>        |
| AtACT#006                    | At5g39090 | 448               | PF02458        | Transferase family                   | 003 - 443 | MACC Synthesis <sup>3</sup>        |
| AtARD1                       | At4g14716 | 192               | PF03079        | ARD/ARD' family                      | 014 - 168 | Yang Cycle                         |
|                              |           |                   | PF07883        | Cupin domain                         | 086 - 162 |                                    |
| AtARD2                       | At4g14710 | 199               | PF03079        | ARD/ARD' family                      | 014 - 168 | Yang Cycle                         |
|                              |           |                   | PF07883        | Cupin domain                         | 086 - 162 |                                    |
| AtARD3                       | At2g26400 | 199               | PF03079        | ARD/ARD' family                      | 014 - 168 | Yang Cycle                         |
|                              |           |                   | PF07883        | Cupin domain                         | 086 - 162 |                                    |

**Table S1.** *Arabidopsis thaliana* Ethylene Biosynthesis Protein List (cont.)

| <i>Arabidopsis thaliana</i> Protein |           |                   | Protein Domain |                                                    |           | Pathway                     |
|-------------------------------------|-----------|-------------------|----------------|----------------------------------------------------|-----------|-----------------------------|
| Generic Name                        | Locus ID  | Size <sup>1</sup> | PFAM Code      | Description                                        | Position  |                             |
| AtARD4                              | At5g43850 | 187               | PF03079        | ARD/ARD' family                                    | 004 - 158 | Yang Cycle                  |
|                                     |           |                   | PF07883        | Cupin domain                                       | 078 - 152 |                             |
| AtASP2                              | At5g19550 | 405               | PF00155        | Aminotransferase class I and II                    | 029 - 397 | Yang Cycle                  |
| ATASP3                              | At5g11520 | 449               | PF00155        | Aminotransferase class I and II                    | 073 - 441 | Yang Cycle                  |
| AtASP5                              | At4g31990 | 453               | PF00155        | Aminotransferase class I and II                    | 077 - 445 | Yang Cycle                  |
| AtDEP1                              | At5g53850 | 507               | PF00596        | Class II aldolase and adducin N-terminal domain    | 026 - 229 | Yang Cycle                  |
|                                     |           |                   | PF00702        | Haloacid dehalogenase-like hydrolase               | 265 - 478 |                             |
| AtGGT1                              | At4g39640 | 572               | PF01019        | Gamma-glutamyltranspeptidase                       | 048 - 567 | GACC Synthesis <sup>3</sup> |
| AtGGT2                              | At4g39650 | 578               | PF01019        | Gamma-glutamyltranspeptidase                       | 052 - 573 | GACC Synthesis <sup>3</sup> |
| AtGGT3                              | At1g69820 | 191               | PF01019        | Gamma-glutamyltranspeptidase                       | 001 - 191 | GACC Synthesis <sup>3</sup> |
| AtGGT4                              | At4g29210 | 637               | PF01019        | Gamma-glutamyltranspeptidase                       | 095 - 632 | GACC Synthesis <sup>3</sup> |
| AtMAT1                              | At1g02500 | 393               | PF00438        | S-adenosylmethionine synthetase, N-terminal domain | 002 - 101 | Ethylene Biosynthesis       |
|                                     |           |                   | PF02772        | S-adenosylmethionine synthetase, central domain    | 116 - 238 |                             |
|                                     |           |                   | PF02773        | S-adenosylmethionine synthetase, C-terminal domain | 240 - 382 |                             |
| AtMAT2                              | At4g01850 | 393               | PF00438        | S-adenosylmethionine synthetase, N-terminal domain | 002 - 101 | Ethylene Biosynthesis       |
|                                     |           |                   | PF02772        | S-adenosylmethionine synthetase, central domain    | 116 - 238 |                             |
|                                     |           |                   | PF02773        | S-adenosylmethionine synthetase, C-terminal domain | 240 - 382 |                             |
| AtMAT3                              | At2g36880 | 390               | PF00438        | S-adenosylmethionine synthetase, N-terminal domain | 002 - 101 | Ethylene Biosynthesis       |
|                                     |           |                   | PF02772        | S-adenosylmethionine synthetase, central domain    | 116 - 238 |                             |
|                                     |           |                   | PF02773        | S-adenosylmethionine synthetase, C-terminal domain | 240 - 382 |                             |
| AtMAT4                              | At3g17390 | 393               | PF00438        | S-adenosylmethionine synthetase, N-terminal domain | 002 - 101 | Ethylene Biosynthesis       |
|                                     |           |                   | PF02772        | S-adenosylmethionine synthetase, central domain    | 116 - 238 |                             |
|                                     |           |                   | PF02773        | S-adenosylmethionine synthetase, C-terminal domain | 240 - 382 |                             |
| AtMTI1                              | At2g05830 | 374               | PF01008        | Initiation factor 2 subunit family                 | 050 - 353 | Yang Cycle                  |
| AtMTK1                              | At1g49820 | 420               | PF01636        | Phosphotransferase enzyme family                   | 038 - 295 | Yang Cycle                  |
| AtMTN1                              | At4g38800 | 267               | PF01048        | Phosphorylase superfamily                          | 028 - 257 | Yang Cycle                  |
| AtMTN2                              | At4g34840 | 254               | PF01048        | Phosphorylase superfamily                          | 015 - 244 | Yang Cycle                  |

<sup>1</sup> Amino acid residues.<sup>2</sup> Putative amino acid transferase (AAT). No ACC synthase activity demonstrated.<sup>3</sup> The primary function of this protein is not initially associated with this metabolic pathway.

**Table S2. *Arabidopsis thaliana* Ethylene Signal Transduction Protein List**

| <i>Arabidopsis thaliana</i> Protein |           |                   | Protein Domain |                                                        |           | Function                                |
|-------------------------------------|-----------|-------------------|----------------|--------------------------------------------------------|-----------|-----------------------------------------|
| Generic Name                        | Locus ID  | Size <sup>1</sup> | PFAM Code      | Description                                            | Position  |                                         |
| AtCDPK2                             | At1g35670 | 495               | PF00069        | Protein kinase domain                                  | 028 - 284 | ACS Type II Activation                  |
|                                     |           |                   | PF00036        | EF hand                                                | 331 - 392 |                                         |
|                                     |           |                   |                |                                                        | 398 - 462 |                                         |
| AtCTR1                              | At5g03730 | 821               | PF14381        | Ethylene responsive protein kinase Le-CTR1             | 205 - 414 | Negative Regulator of Ethylene Response |
|                                     |           |                   | PF07714        | Protein tyrosine kinase                                | 551 - 805 |                                         |
| AtEBF1                              | At2g25490 | 628               | PF00646        | F-box domain                                           | 064 - 104 | Directs EIN3 to Proteolysis             |
| AtEBF2                              | At5g25350 | 625               | PF00646        | F-box domain                                           | 054 - 095 | Directs EIN3 to Proteolysis             |
| AtEIL1                              | At2g27050 | 584               | PF04873        | Ethylene insensitive 3                                 | 049 - 431 | Nuclear Transcription Factor            |
| AtEIL2                              | At5g21120 | 518               | PF04873        | Ethylene insensitive 3                                 | 048 - 408 | Nuclear Transcription Factor            |
| AtEIN2                              | At5g03280 | 1294              | PF01566        | Natural resistance-associated macrophage protein       | 038 - 390 | Acts Downstream of CTR1                 |
| AtEIN3                              | At3g20770 | 628               | PF04873        | Ethylene insensitive 3                                 | 049 - 422 | Nuclear Transcription Factor            |
| AtEIN5                              | At1g54490 | 947               | PF03159        | XRN 5'-3' exonuclease N-terminus                       | 001 - 256 | EBF RNA Silencing                       |
|                                     |           |                   | PF00098        | Zinc knuckle                                           | 263 - 280 |                                         |
| AtEOL1                              | At4g02680 | 888               | PF00515        | Tetratricopeptide repeat                               | 519 - 544 | ACS Type II Negative Regulator          |
| AtEOL2                              | At5g58550 | 925               | PF00515        | Tetratricopeptide repeat                               | 738 - 771 | ACS Type II Negative Regulator          |
| AtETO1                              | At3g51770 | 959               | PF13414        | TPR repeat                                             | 875 - 940 | ACS Type II Negative Regulator          |
| AtEIN4                              | At3g04580 | 766               | PF01590        | GAF domain                                             | 181 - 331 | Ethylene Receptor                       |
|                                     |           |                   | PF00512        | Histidine kinase A (phosphoacceptor) domain            | 367 - 432 |                                         |
|                                     |           |                   | PF00072        | Response regulator receiver domain                     | 644 - 758 |                                         |
| AtERS1                              | At2g40940 | 613               | PF01590        | GAF domain                                             | 158 - 307 | Ethylene Receptor                       |
|                                     |           |                   | PF00512        | Histidine kinase A (phosphoacceptor) domain            | 343 - 408 |                                         |
|                                     |           |                   | PF02518        | Histidine kinase-, DNA gyrase B- and HSP90-like ATPase | 455 - 586 |                                         |
| AtERS2                              | At1g04310 | 645               | PF01590        | GAF domain                                             | 190 - 346 | Ethylene Receptor                       |
| AtETP1                              | At3g18980 | 415               | PF00646        | F-box domain                                           | 001 - 043 | Directs EIN2 to Proteolysis             |
|                                     |           |                   | PF07734        | F-box associated                                       | 214 - 398 |                                         |
| AtETP2                              | At3g18910 | 388               | PF00646        | F-box domain                                           | 007 - 044 | Directs EIN2 to Proteolysis             |
|                                     |           |                   | PF07734        | F-box associated                                       | 206 - 373 |                                         |
| AtETR1                              | At1g66340 | 738               | PF01590        | GAF domain                                             | 158 - 307 | Ethylene Receptor                       |
|                                     |           |                   | PF00512        | Histidine kinase A (phosphoacceptor) domain            | 343 - 408 |                                         |
|                                     |           |                   | PF02518        | Histidine kinase-, DNA gyrase B- and HSP90-like ATPase | 455 - 582 |                                         |
|                                     |           |                   | PF00072        | Response regulator receiver domain                     | 612 - 726 |                                         |

**Table S2.** *Arabidopsis thaliana* Ethylene Signal Transduction Protein List (cont.)

| <i>Arabidopsis thaliana</i> Protein |           |                   | Protein Domain |                                             |           | Function                                |
|-------------------------------------|-----------|-------------------|----------------|---------------------------------------------|-----------|-----------------------------------------|
| Generic Name                        | Locus ID  | Size <sup>1</sup> | PFAM Code      | Description                                 | Position  |                                         |
| AtETR2                              | At3g23150 | 773               | PF01590        | GAF domain                                  | 187 - 331 | Ethylene Receptor                       |
|                                     |           |                   | PF00512        | Histidine kinase A (phosphoacceptor) domain | 367 - 427 |                                         |
|                                     |           |                   | PF00072        | Response regulator receiver domain          | 648 - 763 |                                         |
| AtMKK4                              | At1g51660 | 366               | PF00069        | Protein kinase domain                       | 079 - 334 | ACS Type I Activation                   |
| AtMKK5                              | At3g21220 | 348               | PF00069        | Protein kinase domain                       | 070 - 325 | ACS Type I Activation                   |
| AtMKK9                              | At1g73500 | 310               | PF00069        | Protein kinase domain                       | 047 - 306 | EIN3 Activation                         |
| AtMPK3                              | At3g45640 | 370               | PF00069        | Protein kinase domain                       | 041 - 324 | EIN3 Activation                         |
| AtMPK6                              | At2g43790 | 395               | PF00069        | Protein kinase domain                       | 065 - 348 | ACS Type I/EIN3 Activation              |
| AtRAN1                              | At5g20010 | 221               | PF00071        | Ras family                                  | 015 - 173 | Copper Transporter                      |
| AtRAN2                              | At5g20020 | 221               | PF00071        | Ras family                                  | 015 - 173 | Copper Transporter                      |
| AtRAN3                              | At5g55190 | 221               | PF00071        | Ras family                                  | 015 - 173 | Copper Transporter                      |
| AtRAN4                              | At5g55080 | 222               | PF00071        | Ras family                                  | 015 - 173 | Copper Transporter                      |
| AtRTE1                              | At2g26070 | 250               | PF05608        | Protein of unknown function (DUF778)        | 060 - 195 | Positive Regulator of Ethylene Receptor |
| AtRTH1                              | At3g51040 | 231               | PF05608        | Protein of unknown function (DUF778)        | 038 - 175 | Positive Regulator of Ethylene Receptor |

<sup>1</sup> Amino acid residues.

**Table S3. *Oryza sativa* Ethylene Biosynthesis Protein List**

| <i>Oryza sativa</i> Protein |            |                   | Protein Domain |                                      |           | Pathway <sup>2</sup>               |
|-----------------------------|------------|-------------------|----------------|--------------------------------------|-----------|------------------------------------|
| Generic Name                | Locus ID   | Size <sup>1</sup> | PFAM Code      | Description                          | Position  |                                    |
| OsAAT#001                   | Os09g28050 | 466               | PF00155        | Aminotransferase class I and II      | 109 - 458 | Yang Cycle                         |
| OsAAT#002                   | Os10g34350 | 412               | PF00155        | Aminotransferase class I and II      | 030 - 381 | Yang Cycle                         |
| OsACD#001                   | Os02g53330 | 565               | PF00291        | Pyridoxal-phosphate dependent enzyme | 082 - 388 | ACC Degradation                    |
| OsACO#001                   | Os01g39860 | 312               | PF03171        | 2OG-Fe(II) oxygenase superfamily     | 169 - 264 | Ethylene Biosynthesis              |
| OsACO#002                   | Os02g53180 | 344               | PF03171        | 2OG-Fe(II) oxygenase superfamily     | 184 - 280 | Ethylene Biosynthesis              |
| OsACO#003                   | Os05g05680 | 308               | PF03171        | 2OG-Fe(II) oxygenase superfamily     | 163 - 259 | Ethylene Biosynthesis              |
| OsACO#004                   | Os06g37590 | 293               | PF03171        | 2OG-Fe(II) oxygenase superfamily     | 150 - 246 | Ethylene Biosynthesis              |
| OsACO#005                   | Os09g27750 | 322               | PF03171        | 2OG-Fe(II) oxygenase superfamily     | 164 - 259 | Ethylene Biosynthesis              |
| OsACO#006                   | Os09g27820 | 322               | PF03171        | 2OG-Fe(II) oxygenase superfamily     | 164 - 259 | Ethylene Biosynthesis              |
| OsACO#007                   | Os11g08380 | 309               | PF03171        | 2OG-Fe(II) oxygenase superfamily     | 163 - 262 | Ethylene Biosynthesis              |
| OsACS#001                   | Os01g09700 | 510               | PF00155        | Aminotransferase class I and II      | 104 - 488 | Ethylene Biosynthesis              |
| OsACS#002                   | Os03g51740 | 487               | PF00155        | Aminotransferase class I and II      | 051 - 438 | Ethylene Biosynthesis              |
| OsACS#003                   | Os04g48850 | 483               | PF00155        | Aminotransferase class I and II      | 046 - 427 | Ethylene Biosynthesis              |
| OsACS#004                   | Os05g10780 | 437               | PF00155        | Aminotransferase class I and II      | 035 - 423 | Ethylene Biosynthesis              |
| OsACS#005                   | Os05g25490 | 496               | PF00155        | Aminotransferase class I and II      | 056 - 457 | Ethylene Biosynthesis              |
| OsACS#006                   | Os06g03990 | 542               | PF00155        | Aminotransferase class I and II      | 147 - 531 | Ethylene Biosynthesis <sup>3</sup> |
| OsACT#001                   | Os02g57480 | 453               | PF02458        | Transferase family                   | 006 - 444 | MACC Synthesis <sup>4</sup>        |
| OsACT#002                   | Os03g18590 | 387               | PF02458        | Transferase family                   | 086 - 357 | MACC Synthesis <sup>4</sup>        |
| OsACT#003                   | Os07g23150 | 525               | PF02458        | Transferase family                   | 067 - 510 | MACC Synthesis <sup>4</sup>        |
| OsARD#001                   | Os03g06620 | 198               | PF03079        | ARD/ARD' family                      | 015 - 168 | Yang Cycle                         |
|                             |            |                   | PF07883        | Cupin domain                         | 097 - 153 |                                    |
| OsARD#002                   | Os04g27830 | 284               | PF03079        | ARD/ARD' family                      | 079 - 247 | Yang Cycle                         |
|                             |            |                   | PF07883        | Cupin domain                         | 164 - 219 |                                    |
| OsARD#003                   | Os10g28350 | 199               | PF03079        | ARD/ARD' family                      | 015 - 168 | Yang Cycle                         |
|                             |            |                   | PF07883        | Cupin domain                         | 096 - 152 |                                    |
| OsARD#004                   | Os10g28360 | 184               | PF03079        | ARD/ARD' family                      | 015 - 155 | Yang Cycle                         |
|                             |            |                   | PF07883        | Cupin domain                         | 085 - 143 |                                    |
| OsASP#001                   | Os01g55540 | 460               | PF00155        | Aminotransferase class I and II      | 086 - 452 | Yang Cycle                         |
| OsASP#002                   | Os02g14110 | 432               | PF00155        | Aminotransferase class I and II      | 060 - 425 | Yang Cycle                         |
| OsASP#003                   | Os02g55420 | 458               | PF00155        | Aminotransferase class I and II      | 084 - 450 | Yang Cycle                         |
| OsASP#004                   | Os06g35540 | 463               | PF00155        | Aminotransferase class I and II      | 091 - 456 | Yang Cycle                         |

**Table S3.** *Oryza sativa* Ethylene Biosynthesis Protein List (cont.)

| <i>Oryza sativa</i> Protein |            |                   | Protein Domain |                                                    |           | Pathway <sup>2</sup>        |
|-----------------------------|------------|-------------------|----------------|----------------------------------------------------|-----------|-----------------------------|
| Generic Name                | Locus ID   | Size <sup>1</sup> | PFAM Code      | Description                                        | Position  |                             |
| OsDEP#001                   | Os11g29370 | 518               | PF00596        | Class II aldolase and adducin N-terminal domain    | 032 - 232 | Yang Cycle                  |
|                             |            |                   | PF00702        | Haloacid dehalogenase-like hydrolase               | 279 - 494 |                             |
| OsGGT#001                   | Os01g05810 | 634               | PF01019        | Gamma-glutamyltranspeptidase                       | 098 - 628 | GACC Synthesis <sup>4</sup> |
| OsGGT#002                   | Os01g05820 | 563               | PF01019        | Gamma-glutamyltranspeptidase                       | 094 - 457 | GACC Synthesis <sup>4</sup> |
| OsGGT#003                   | Os04g38450 | 574               | PF01019        | Gamma-glutamyltranspeptidase                       | 057 - 569 | GACC Synthesis <sup>4</sup> |
| OsMAT#001                   | Os01g18860 | 396               | PF00438        | S-adenosylmethionine synthetase, N-terminal domain | 006 - 104 | Ethylene Biosynthesis       |
|                             |            |                   | PF02772        | S-adenosylmethionine synthetase, central domain    | 119 - 241 |                             |
|                             |            |                   | PF02773        | S-adenosylmethionine synthetase, C-terminal domain | 243 - 384 |                             |
| OsMAT#002                   | Os01g22010 | 394               | PF00438        | S-adenosylmethionine synthetase, N-terminal domain | 005 - 103 | Ethylene Biosynthesis       |
|                             |            |                   | PF02772        | S-adenosylmethionine synthetase, central domain    | 118 - 240 |                             |
|                             |            |                   | PF02773        | S-adenosylmethionine synthetase, C-terminal domain | 242 - 382 |                             |
| OsMAT#003                   | Os05g04510 | 396               | PF00438        | S-adenosylmethionine synthetase, N-terminal domain | 006 - 104 | Ethylene Biosynthesis       |
|                             |            |                   | PF02772        | S-adenosylmethionine synthetase, central domain    | 119 - 241 |                             |
|                             |            |                   | PF02773        | S-adenosylmethionine synthetase, C-terminal domain | 243 - 384 |                             |
| OsMTI#001                   | Os11g11050 | 508               | PF01008        | Initiation factor 2 subunit family                 | 183 - 484 | Yang Cycle                  |
| OsMTK#001                   | Os04g57400 | 430               | PF01636        | Phosphotransferase enzyme family                   | 047 - 297 | Yang Cycle                  |
| OsMTK#002                   | Os04g57410 | 427               | PF01636        | Phosphotransferase enzyme family                   | 044 - 294 | Yang Cycle                  |
| OsMTN#001                   | Os06g02220 | 259               | PF01048        | Phosphorylase superfamily                          | 020 - 248 | Yang Cycle                  |

<sup>1</sup> Amino acid residues.

<sup>2</sup> This parameter was determined by homology with equivalent *Arabidopsis thaliana* amino acid sequence.

<sup>3</sup> Putative amino acid transferase (AAT). No ACC synthase activity demonstrated.

<sup>4</sup> The primary function of this protein is not initially associated with this metabolic pathway.

**Table S4. *Oryza sativa* Ethylene Signal Transduction Protein List**

| <i>Oryza sativa</i> Protein |            |                   | Protein Domain |                                                        |           | Putative Function <sup>2</sup>          |
|-----------------------------|------------|-------------------|----------------|--------------------------------------------------------|-----------|-----------------------------------------|
| Generic Name                | Locus ID   | Size <sup>1</sup> | PFAM Code      | Description                                            | Position  |                                         |
| OsCPK#001                   | Os11g07040 | 513               | PF00069        | Protein kinase domain                                  | 047 - 305 | ACS Type II Activation                  |
|                             |            |                   | PF00036        | EF hand                                                | 352 - 413 |                                         |
|                             |            |                   |                |                                                        | 418 - 483 |                                         |
| OsCPK#002                   | Os12g07230 | 526               | PF00069        | Protein kinase domain                                  | 049 - 307 | ACS Type II Activation                  |
|                             |            |                   | PF00036        | EF hand                                                | 354 - 415 |                                         |
|                             |            |                   |                |                                                        | 420 - 485 |                                         |
| OsCTR#001                   | Os02g32610 | 781               | PF07714        | Protein tyrosine kinase                                | 167 - 377 | Negative Regulator of Ethylene Response |
|                             |            |                   | PF14381        | Ethylene responsive protein kinase Le-CTR1             | 512 - 766 |                                         |
| OsCTR#002                   | Os09g39320 | 1220              | PF07714        | Protein tyrosine kinase                                | 121 - 329 | Negative Regulator of Ethylene Response |
|                             |            |                   | PF14381        | Ethylene responsive protein kinase Le-CTR1             | 481 - 723 |                                         |
| OsEBF#001                   | Os02g10700 | 660               | PF00646        | F-box domain                                           | 066 - 111 | Directs EIN3 to Proteolysis             |
| OsEBF#002                   | Os06g40360 | 664               | PF00646        | F-box domain                                           | 077 - 113 | Directs EIN3 to Proteolysis             |
| OsEIN#001                   | Os02g28074 | 822               | PF03159        | XRN 5'-3' exonuclease N-terminus                       | 001 - 230 | EBF RNA Silencing                       |
| OsEIN#002                   | Os03g20780 | 643               | PF04873        | Ethylene insensitive 3                                 | 078 - 464 | Nuclear Transcription Factor            |
| OsEIN#003                   | Os03g20790 | 640               | PF04873        | Ethylene insensitive 3                                 | 078 - 464 | Nuclear Transcription Factor            |
| OsEIN#004                   | Os03g49400 | 1299              | PF01566        | Natural resistance-associated macrophage protein       | 039 - 391 | Acts Downstream of CTR1                 |
|                             |            |                   | PF03159        | XRN 5'-3' exonuclease N-terminus                       | 001 - 256 | EBF RNA Silencing                       |
|                             |            |                   | PF00098        | Zinc knuckle                                           | 263 - 280 |                                         |
| OsEIN#006                   | Os07g06130 | 1281              | PF01566        | Natural resistance-associated macrophage protein       | 047 - 399 | Acts Downstream of CTR1                 |
| OsEIN#007                   | Os07g06190 | 1367              | PF01566        | Natural resistance-associated macrophage protein       | 258 - 584 | Acts Downstream of CTR1                 |
| OsEIN#008                   | Os07g06300 | 1367              | PF01566        | Natural resistance-associated macrophage protein       | 258 - 584 | Acts Downstream of CTR1                 |
| OsETO#001                   | Os03g18360 | 958               | PF07719        | Tetratricopeptide repeat                               | 704 - 737 | ACS Type II Negative Regulator          |
| OsETO#002                   | Os07g08120 | 886               | PF13414        | TPR Repeat                                             | 707 - 772 | ACS Type II Negative Regulator          |
| OsETO#003                   | Os11g37520 | 886               | PF13414        | TPR Repeat                                             | 804 - 869 | ACS Type II Negative Regulator          |
|                             |            |                   | PF01590        | GAF domain                                             | 269 - 413 |                                         |
|                             |            |                   | PF00512        | Histidine kinase A (phosphoacceptor) domain            | 449 - 514 |                                         |
| OsETR#001                   | Os02g57530 | 836               | PF00072        | Response regulator receiver domain                     | 717 - 830 | Ethylene Receptor                       |
|                             |            |                   | PF01590        | GAF domain                                             | 158 - 307 |                                         |
|                             |            |                   | PF00512        | Histidine kinase A (phosphoacceptor) domain            | 343 - 408 |                                         |
| OsETR#002                   | Os03g49500 | 636               | PF02518        | Histidine kinase-, DNA gyrase B- and HSP90-like ATPase | 455 - 586 | Ethylene Receptor                       |

**Table S4.** *Oryza sativa* Ethylene Signal Transduction Protein List (cont.)

| <i>Oryza sativa</i> Protein |            |                   | Protein Domain |                                             |           | Putative Function <sup>2</sup>          |
|-----------------------------|------------|-------------------|----------------|---------------------------------------------|-----------|-----------------------------------------|
| Generic Name                | Locus ID   | Size <sup>1</sup> | PFAM Code      | Description                                 | Position  |                                         |
| OsETR#003                   | Os04g08740 | 763               | PF01590        | GAF domain                                  | 190 - 339 | Ethylene Receptor                       |
|                             |            |                   | PF00072        | Response regulator receiver domain          | 642 - 757 |                                         |
| OsETR#004                   | Os05g06320 | 518               | PF01590        | GAF domain                                  | 159 - 308 | Ethylene Receptor                       |
|                             |            |                   | PF00512        | Histidine kinase A (phosphoacceptor) domain | 344 - 409 |                                         |
| OsETR#005                   | Os07g15540 | 777               | PF01590        | GAF domain                                  | 184 - 344 | Ethylene Receptor                       |
|                             |            |                   | PF00072        | Response regulator receiver domain          | 646 - 770 |                                         |
| OsMKK#001                   | Os01g32660 | 355               | PF00069        | Protein kinase domain                       | 071 - 330 | ACS Type I Activation                   |
| OsMKK#002                   | Os02g54600 | 369               | PF00069        | Protein kinase domain                       | 093 - 350 | ACS Type I Activation                   |
| OsMKK#003                   | Os03g12390 | 339               | PF00069        | Protein kinase domain                       | 049 - 314 | EIN3 Activation                         |
| OsMKK#004                   | Os03g50550 | 345               | PF00069        | Protein kinase domain                       | 060 - 326 | EIN3 Activation                         |
| OsMKK#005                   | Os06g09180 | 342               | PF00069        | Protein kinase domain                       | 070 - 327 | ACS Type I Activation                   |
| OsMPK#001                   | Os03g17700 | 369               | PF00069        | Protein kinase domain                       | 038 - 322 | EIN3 Activation                         |
| OsMPK#002                   | Os06g06090 | 398               | PF00069        | Protein kinase domain                       | 070 - 352 | ACS Type I/EIN3 Activation              |
| OsRAN#001                   | Os05g49890 | 221               | PF00071        | Ras family                                  | 015 - 173 | Copper Transporter                      |
| OsRAN#002                   | Os06g39875 | 226               | PF00071        | Ras family                                  | 019 - 177 | Copper Transporter                      |
| OsRTE#001                   | Os01g51430 | 241               | PF05608        | Protein of unknown function (DUF778)        | 051 - 186 | Positive Regulator of Ethylene Receptor |
| OsRTE#002                   | Os03g58520 | 204               | PF05608        | Protein of unknown function (DUF778)        | 027 - 148 | Positive Regulator of Ethylene Receptor |
| OsRTE#003                   | Os05g46240 | 233               | PF05608        | Protein of unknown function (DUF778)        | 043 - 178 | Positive Regulator of Ethylene Receptor |

<sup>1</sup> Amino acid residues.<sup>2</sup> This parameter was determined by homology with equivalent *Arabidopsis thaliana* amino acid sequence.



**Table S5.** Soybean Ethylene Biosynthesis Protein Summary

| <i>Glycine max</i> Protein |               |                   | Best Amino Acid Sequence Homology |           |                     |            | Soybean Protein Domain |                                      |           | Pathway <sup>2</sup>               |
|----------------------------|---------------|-------------------|-----------------------------------|-----------|---------------------|------------|------------------------|--------------------------------------|-----------|------------------------------------|
| Generic Name               | Locus ID      | Size <sup>1</sup> | <i>Arabidopsis thaliana</i>       |           | <i>Oryza sativa</i> |            | PFAM Code              | Description                          | Position  |                                    |
| GmAAT#001                  | Glyma02g01830 | 401               | AtAAT                             | At1g77670 | OsAAT#002           | Os10g34350 | PF00155                | Aminotransferase class I and II      | 027 - 388 | Yang Cycle                         |
| GmAAT#002                  | Glyma04g43080 | 450               | AtAAT                             | At1g77670 | OsAAT#001           | Os09g28050 | PF00155                | Aminotransferase class I and II      | 091 - 444 | Yang Cycle                         |
| GmAAT#003                  | Glyma06g11630 | 254               | AtAAT                             | At1g77670 | OsAAT#001           | Os09g28050 | PF00155                | Aminotransferase class I and II      | 001 - 250 | Yang Cycle                         |
| GmAAT#004                  | Glyma06g11640 | 439               | AtAAT                             | At1g77670 | OsAAT#001           | Os09g28050 | PF00155                | Aminotransferase class I and II      | 080 - 433 | Yang Cycle                         |
| GmACD#001                  | Glyma05g33540 | 379               | AtACD1                            | At1g48420 | OsACD#001           | Os02g53330 | PF00291                | Pyridoxal-phosphate dependent enzyme | 032 - 341 | ACC Degradation                    |
| GmACD#002                  | Glyma08g06170 | 223               | AtACD1                            | At1g48420 | OsACD#001           | Os02g53330 | PF00291                | Pyridoxal-phosphate dependent enzyme | 013 - 185 | ACC Degradation                    |
| GmACO#001                  | Glyma02g43560 | 315               | AtACO4                            | At1g05010 | OsACO#006           | Os09g27820 | PF03171                | 2OG-Fe(II) oxygenase superfamily     | 153 - 253 | Ethylene Biosynthesis              |
| GmACO#002                  | Glyma02g43580 | 307               | AtACO4                            | At1g05010 | OsACO#006           | Os09g27820 | PF03171                | 2OG-Fe(II) oxygenase superfamily     | 150 - 250 | Ethylene Biosynthesis              |
| GmACO#003                  | Glyma02g43600 | 291               | AtACO4                            | At1g05010 | OsACO#006           | Os09g27820 | PF03171                | 2OG-Fe(II) oxygenase superfamily     | 134 - 234 | Ethylene Biosynthesis              |
| GmACO#004                  | Glyma04g42460 | 308               | AtACO#002                         | At1g77330 | OsACO#003           | Os05g05680 | PF03171                | 2OG-Fe(II) oxygenase superfamily     | 154 - 254 | Ethylene Biosynthesis              |
| GmACO#005                  | Glyma05g36310 | 307               | AtACO1                            | At2g19590 | OsACO#004           | Os06g37590 | PF03171                | 2OG-Fe(II) oxygenase superfamily     | 152 - 253 | Ethylene Biosynthesis              |
| GmACO#006                  | Glyma06g12340 | 307               | AtACO#002                         | At1g77330 | OsACO#003           | Os05g05680 | PF03171                | 2OG-Fe(II) oxygenase superfamily     | 153 - 253 | Ethylene Biosynthesis              |
| GmACO#007                  | Glyma07g15480 | 306               | AtACO1                            | At2g19590 | OsACO#004           | Os06g37590 | PF03171                | 2OG-Fe(II) oxygenase superfamily     | 151 - 252 | Ethylene Biosynthesis              |
| GmACO#008                  | Glyma07g39420 | 318               | AtACO4                            | At1g05010 | OsACO#005           | Os09g27750 | PF03171                | 2OG-Fe(II) oxygenase superfamily     | 153 - 253 | Ethylene Biosynthesis              |
| GmACO#009                  | Glyma08g03310 | 307               | AtACO1                            | At2g19590 | OsACO#004           | Os06g37590 | PF03171                | 2OG-Fe(II) oxygenase superfamily     | 152 - 253 | Ethylene Biosynthesis              |
| GmACO#010                  | Glyma08g05500 | 310               | AtACO4                            | At1g05010 | OsACO#006           | Os09g27820 | PF03171                | 2OG-Fe(II) oxygenase superfamily     | 153 - 253 | Ethylene Biosynthesis              |
| GmACO#011                  | Glyma09g01110 | 318               | AtACO4                            | At1g05010 | OsACO#005           | Os09g27750 | PF03171                | 2OG-Fe(II) oxygenase superfamily     | 153 - 253 | Ethylene Biosynthesis              |
| GmACO#012                  | Glyma14g05350 | 307               | AtACO4                            | At1g05010 | OsACO#006           | Os09g27820 | PF03171                | 2OG-Fe(II) oxygenase superfamily     | 150 - 250 | Ethylene Biosynthesis              |
| GmACO#013                  | Glyma14g05360 | 307               | AtACO4                            | At1g05010 | OsACO#006           | Os09g27820 | PF03171                | 2OG-Fe(II) oxygenase superfamily     | 150 - 250 | Ethylene Biosynthesis              |
| GmACO#014                  | Glyma14g05390 | 315               | AtACO4                            | At1g05010 | OsACO#002           | Os02g53180 | PF03171                | 2OG-Fe(II) oxygenase superfamily     | 153 - 253 | Ethylene Biosynthesis              |
| GmACO#015                  | Glyma15g11930 | 318               | AtACO4                            | At1g05010 | OsACO#005           | Os09g27750 | PF03171                | 2OG-Fe(II) oxygenase superfamily     | 153 - 253 | Ethylene Biosynthesis              |
| GmACO#016                  | Glyma17g01330 | 319               | AtACO4                            | At1g05010 | OsACO#005           | Os09g27750 | PF03171                | 2OG-Fe(II) oxygenase superfamily     | 154 - 254 | Ethylene Biosynthesis              |
| GmACS#001                  | Glyma01g00700 | 442               | AtACS7                            | At4g26200 | OsACS#004           | Os05g10780 | PF00155                | Aminotransferase class I and II      | 044 - 428 | Ethylene Biosynthesis              |
| GmACS#002                  | Glyma01g40400 | 470               | AtACS8                            | At4g37770 | OsACS#002           | Os03g51740 | PF00155                | Aminotransferase class I and II      | 040 - 423 | Ethylene Biosynthesis              |
| GmACS#003                  | Glyma01g42290 | 502               | AtACS10                           | At1g62960 | OsACS#006           | Os06g03990 | PF00155                | Aminotransferase class I and II      | 113 - 491 | Ethylene Biosynthesis <sup>3</sup> |
| GmACS#004                  | Glyma04g05150 | 437               | AtACS8                            | At4g37770 | OsACS#002           | Os03g51740 | PF00155                | Aminotransferase class I and II      | 040 - 426 | Ethylene Biosynthesis              |
| GmACS#005                  | Glyma05g23020 | 480               | AtACS8                            | At4g37770 | OsACS#002           | Os03g51740 | PF00155                | Aminotransferase class I and II      | 040 - 427 | Ethylene Biosynthesis              |
| GmACS#006                  | Glyma05g36250 | 440               | AtACS7                            | At4g26200 | OsACS#005           | Os05g25490 | PF00155                | Aminotransferase class I and II      | 050 - 430 | Ethylene Biosynthesis              |
| GmACS#007                  | Glyma05g37410 | 434               | AtACS1                            | At3g61510 | OsACS#003           | Os04g48850 | PF00155                | Aminotransferase class I and II      | 001 - 381 | Ethylene Biosynthesis              |
| GmACS#008                  | Glyma06g05240 | 354               | AtACS8                            | At4g37770 | OsACS#002           | Os03g51740 | PF00155                | Aminotransferase class I and II      | 001 - 341 | Ethylene Biosynthesis              |

**Table S5.** Soybean Ethylene Biosynthesis Protein Summary (cont.)

| <i>Glycine max</i> Protein |               |                   | Best Amino Acid Sequence Homology |           |                     |            | Soybean Protein Domain |                                 |           | Pathway <sup>2</sup>               |
|----------------------------|---------------|-------------------|-----------------------------------|-----------|---------------------|------------|------------------------|---------------------------------|-----------|------------------------------------|
| Generic Name               | Locus ID      | Size <sup>1</sup> | <i>Arabidopsis thaliana</i>       |           | <i>Oryza sativa</i> |            | PFAM Code              | Description                     | Position  |                                    |
| GmACS#009                  | Glyma07g07160 | 474               | AtACS1                            | At3g61510 | OsACS#003           | Os04g48850 | PF00155                | Aminotransferase class I and II | 043 - 424 | Ethylene Biosynthesis              |
| GmACS#010                  | Glyma07g15380 | 426               | AtACS7                            | At4g26200 | OsACS#004           | Os05g10780 | PF00155                | Aminotransferase class I and II | 044 - 425 | Ethylene Biosynthesis              |
| GmACS#011                  | Glyma08g02130 | 484               | AtACS6                            | At4g11280 | OsACS#003           | Os04g48850 | PF00155                | Aminotransferase class I and II | 048 - 431 | Ethylene Biosynthesis              |
| GmACS#012                  | Glyma08g03400 | 440               | AtACS7                            | At4g26200 | OsACS#004           | Os05g10780 | PF00155                | Aminotransferase class I and II | 050 - 430 | Ethylene Biosynthesis              |
| GmACS#013                  | Glyma09g28000 | 500               | AtACS12                           | At5g51690 | OsACS#006           | Os06g03990 | PF00155                | Aminotransferase class I and II | 110 - 489 | Ethylene Biosynthesis <sup>3</sup> |
| GmACS#014                  | Glyma09g39060 | 485               | AtACS1                            | At3g61510 | OsACS#003           | Os04g48850 | PF00155                | Aminotransferase class I and II | 047 - 428 | Ethylene Biosynthesis              |
| GmACS#015                  | Glyma11g02390 | 465               | AtACS6                            | At4g11280 | OsACS#003           | Os04g48850 | PF00155                | Aminotransferase class I and II | 038 - 421 | Ethylene Biosynthesis              |
| GmACS#016                  | Glyma11g03070 | 501               | AtACS10                           | At1g62960 | OsACS#006           | Os06g03990 | PF00155                | Aminotransferase class I and II | 112 - 490 | Ethylene Biosynthesis <sup>3</sup> |
| GmACS#017                  | Glyma11g04890 | 471               | AtACS8                            | At4g37770 | OsACS#002           | Os03g51740 | PF00155                | Aminotransferase class I and II | 040 - 423 | Ethylene Biosynthesis              |
| GmACS#018                  | Glyma16g03600 | 474               | AtACS1                            | At3g61510 | OsACS#003           | Os04g48850 | PF00155                | Aminotransferase class I and II | 043 - 424 | Ethylene Biosynthesis              |
| GmACS#019                  | Glyma16g32860 | 517               | AtACS12                           | At5g51690 | OsACS#006           | Os06g03990 | PF00155                | Aminotransferase class I and II | 127 - 506 | Ethylene Biosynthesis <sup>3</sup> |
| GmACS#020                  | Glyma17g16990 | 475               | AtACS8                            | At4g37770 | OsACS#002           | Os03g51740 | PF00155                | Aminotransferase class I and II | 040 - 425 | Ethylene Biosynthesis              |
| GmACS#021                  | Glyma18g47280 | 495               | AtACS1                            | At3g61510 | OsACS#003           | Os04g48850 | PF00155                | Aminotransferase class I and II | 047 - 428 | Ethylene Biosynthesis              |
| GmACT#001                  | Glyma08g27120 | 430               | AtACT#006                         | At5g39090 | OsACT#001           | Os02g57480 | PF02458                | Transferase family              | 002 - 429 | MACC Synthesis <sup>4</sup>        |
| GmACT#002                  | Glyma08g27130 | 447               | AtACT#004                         | At3g29670 | OsACT#003           | Os07g23150 | PF02458                | Transferase family              | 242 - 239 | MACC Synthesis <sup>4</sup>        |
| GmACT#003                  | Glyma08g27500 | 469               | AtACT#001                         | At1g03940 | OsACT#001           | Os02g57480 | PF02458                | Transferase family              | 005 - 461 | MACC Synthesis <sup>4</sup>        |
| GmACT#004                  | Glyma11g29490 | 354               | AtACT#003                         | At2g30200 | OsACT#002           | Os03g18590 | PF02458                | Transferase family              | 053 - 353 | MACC Synthesis <sup>4</sup>        |
| GmACT#005                  | Glyma11g29520 | 230               | AtACT#003                         | At2g30200 | OsACT#002           | Os03g18590 | PF02458                | Transferase family              | 002 - 227 | MACC Synthesis <sup>4</sup>        |
| GmACT#006                  | Glyma12g32630 | 421               | AtACT#002                         | At1g03495 | OsACT#001           | Os02g57480 | PF02458                | Transferase family              | 002 - 421 | MACC Synthesis <sup>4</sup>        |
| GmACT#007                  | Glyma12g32640 | 466               | AtACT#002                         | At1g03495 | OsACT#003           | Os07g23150 | PF02458                | Transferase family              | 008 - 453 | MACC Synthesis <sup>4</sup>        |
| GmACT#008                  | Glyma12g32650 | 443               | AtACT#001                         | At1g03940 | OsACT#001           | Os02g57480 | PF02458                | Transferase family              | 213 - 435 | MACC Synthesis <sup>4</sup>        |
| GmACT#009                  | Glyma12g32660 | 467               | AtACT#001                         | At1g03940 | OsACT#001           | Os02g57480 | PF02458                | Transferase family              | 008 - 461 | MACC Synthesis <sup>4</sup>        |
| GmACT#010                  | Glyma13g06230 | 467               | AtACT#006                         | At5g39090 | OsACT#001           | Os02g57480 | PF02458                | Transferase family              | 005 - 462 | MACC Synthesis <sup>4</sup>        |
| GmACT#011                  | Glyma13g06550 | 449               | AtACT#005                         | At5g39050 | OsACT#001           | Os02g57480 | PF02458                | Transferase family              | 015 - 448 | MACC Synthesis <sup>4</sup>        |
| GmACT#012                  | Glyma13g37810 | 469               | AtACT#001                         | At1g03940 | OsACT#001           | Os02g57480 | PF02458                | Transferase family              | 002 - 462 | MACC Synthesis <sup>4</sup>        |
| GmACT#013                  | Glyma13g37830 | 462               | AtACT#002                         | At1g03495 | OsACT#001           | Os02g57480 | PF02458                | Transferase family              | 008 - 450 | MACC Synthesis <sup>4</sup>        |
| GmACT#014                  | Glyma13g37840 | 405               | AtACT#002                         | At1g03495 | OsACT#001           | Os02g57480 | PF02458                | Transferase family              | 001 - 405 | MACC Synthesis <sup>4</sup>        |
| GmACT#015                  | Glyma13g37850 | 441               | AtACT#002                         | At1g03495 | OsACT#001           | Os02g57480 | PF02458                | Transferase family              | 010 - 433 | MACC Synthesis <sup>4</sup>        |
| GmACT#016                  | Glyma14g03820 | 473               | AtACT#001                         | At1g03940 | OsACT#003           | Os07g23150 | PF02458                | Transferase family              | 005 - 464 | MACC Synthesis <sup>4</sup>        |
| GmACT#017                  | Glyma18g06500 | 358               | AtACT#003                         | At2g30200 | OsACT#002           | Os03g18590 | PF02458                | Transferase family              | 056 - 356 | MACC Synthesis <sup>4</sup>        |

**Table S5. Soybean Ethylene Biosynthesis Protein Summary (cont.)**

| <i>Glycine max</i> Protein |               |                   | Best Amino Acid Sequence Homology |           |                     |            | Soybean Protein Domain |                                                 |           | Pathway <sup>2</sup>        |
|----------------------------|---------------|-------------------|-----------------------------------|-----------|---------------------|------------|------------------------|-------------------------------------------------|-----------|-----------------------------|
| Generic Name               | Locus ID      | Size <sup>1</sup> | <i>Arabidopsis thaliana</i>       |           | <i>Oryza sativa</i> |            | PFAM Code              | Description                                     | Position  |                             |
| GmACT#018                  | Glyma18g49240 | 511               | AtACT#004                         | At3g29670 | OsACT#001           | Os02g57480 | PF02458                | Transferase family                              | 004 - 507 | MACC Synthesis <sup>4</sup> |
| GmACT#019                  | Glyma18g50310 | 479               | AtACT#005                         | At5g39050 | OsACT#001           | Os02g57480 | PF02458                | Transferase family                              | 006 - 475 | MACC Synthesis <sup>4</sup> |
| GmACT#020                  | Glyma18g50320 | 476               | AtACT#005                         | At5g39050 | OsACT#001           | Os02g57480 | PF02458                | Transferase family                              | 004 - 473 | MACC Synthesis <sup>4</sup> |
| GmACT#021                  | Glyma18g50330 | 452               | AtACT#005                         | At5g39050 | OsACT#001           | Os02g57480 | PF02458                | Transferase family                              | 001 - 452 | MACC Synthesis <sup>4</sup> |
| GmACT#022                  | Glyma18g50340 | 450               | AtACT#006                         | At5g39090 | OsACT#001           | Os02g57480 | PF02458                | Transferase family                              | 001 - 444 | MACC Synthesis <sup>4</sup> |
| GmACT#023                  | Glyma18g50350 | 450               | AtACT#006                         | At5g39090 | OsACT#001           | Os02g57480 | PF02458                | Transferase family                              | 003 - 444 | MACC Synthesis <sup>4</sup> |
| GmACT#024                  | Glyma18g50360 | 389               | AtACT#004                         | At3g29670 | OsACT#001           | Os02g57480 | PF02458                | Transferase family                              | 019 - 154 | MACC Synthesis <sup>4</sup> |
| GmACT#025                  | Glyma19g03730 | 460               | AtACT#006                         | At5g39090 | OsACT#001           | Os02g57480 | PF02458                | Transferase family                              | 004 - 456 | MACC Synthesis <sup>4</sup> |
| GmACT#026                  | Glyma19g03760 | 476               | AtACT#006                         | At5g39090 | OsACT#001           | Os02g57480 | PF02458                | Transferase family                              | 016 - 472 | MACC Synthesis <sup>4</sup> |
| GmACT#027                  | Glyma19g03770 | 464               | AtACT#006                         | At5g39090 | OsACT#001           | Os02g57480 | PF02458                | Transferase family                              | 019 - 461 | MACC Synthesis <sup>4</sup> |
| GmACT#028                  | Glyma19g05220 | 457               | AtACT#002                         | At1g03495 | OsACT#001           | Os02g57480 | PF02458                | Transferase family                              | 012 - 412 | MACC Synthesis <sup>4</sup> |
| GmACT#029                  | Glyma19g05290 | 477               | AtACT#002                         | At1g03495 | OsACT#001           | Os02g57480 | PF02458                | Transferase family                              | 011 - 471 | MACC Synthesis <sup>4</sup> |
| GmACT#030                  | Glyma19g11320 | 451               | AtACT#002                         | At1g03495 | OsACT#001           | Os02g57480 | PF02458                | Transferase family                              | 008 - 304 | MACC Synthesis <sup>4</sup> |
| GmARD#001                  | Glyma10g38940 | 200               | AtARD2                            | At4g14710 | OsARD#001           | Os03g06620 | PF03079                | ARD/ARD' family                                 | 014 - 168 | Yang Cycle                  |
|                            |               |                   |                                   |           |                     |            | PF07883                | Cupin domain                                    | 088 - 160 |                             |
| GmARD#002                  | Glyma10g38960 | 201               | AtARD4                            | At5g43850 | OsARD#004           | Os10g28360 | PF03079                | ARD/ARD' family                                 | 018 - 172 | Yang Cycle                  |
|                            |               |                   |                                   |           |                     |            | PF07883                | Cupin domain                                    | 092 - 164 |                             |
| GmARD#003                  | Glyma20g28850 | 187               | AtARD4                            | At5g43850 | OsARD#001           | Os03g06620 | PF03079                | ARD/ARD' family                                 | 004 - 158 | Yang Cycle                  |
|                            |               |                   |                                   |           |                     |            | PF07883                | Cupin domain                                    | 078 - 150 |                             |
| GmARD#004                  | Glyma20g28860 | 200               | AtARD2                            | At4g14710 | OsARD#001           | Os03g06620 | PF03079                | ARD/ARD' family                                 | 014 - 168 | Yang Cycle                  |
|                            |               |                   |                                   |           |                     |            | PF07883                | Cupin domain                                    | 088 - 160 |                             |
| GmASP#001                  | Glyma04g08560 | 416               | AtASP3                            | At5g11520 | OsASP#001           | Os01g55540 | PF00155                | Aminotransferase class I and II                 | 040 - 408 | Yang Cycle                  |
| GmASP#002                  | Glyma06g08670 | 456               | AtASP3                            | At5g11520 | OsASP#001           | Os01g55540 | PF00155                | Aminotransferase class I and II                 | 080 - 448 | Yang Cycle                  |
| GmASP#003                  | Glyma14g13480 | 463               | AtASP5                            | At4g31990 | OsASP#002           | Os02g55420 | PF00155                | Aminotransferase class I and II                 | 087 - 455 | Yang Cycle                  |
| GmASP#004                  | Glyma17g33050 | 466               | AtASP5                            | At4g31990 | OsASP#002           | Os02g55420 | PF00155                | Aminotransferase class I and II                 | 090 - 458 | Yang Cycle                  |
| GmDEP#001                  | Glyma06g36620 | 518               | AtDEP1                            | At5g53850 | OsDEP#001           | Os11g29370 | PF00596                | Class II aldolase and adducin N-terminal domain | 027 - 230 | Yang Cycle                  |
|                            |               |                   |                                   |           |                     |            | PF00702                | Haloacid dehalogenase-like hydrolase            | 276 - 489 |                             |
| GmDEP#002                  | Glyma12g35390 | 522               | AtDEP1                            | At5g53850 | OsDEP#001           | Os11g29370 | PF00596                | Class II aldolase and adducin N-terminal domain | 030 - 233 | Yang Cycle                  |
|                            |               |                   |                                   |           |                     |            | PF00702                | Haloacid dehalogenase-like hydrolase            | 280 - 493 |                             |

**Table S5. Soybean Ethylene Biosynthesis Protein Summary (cont.)**

| <i>Glycine max</i> Protein |               |                   | Best Amino Acid Sequence Homology |           |                     |            | Soybean Protein Domain |                                                    |           | Pathway <sup>2</sup>        |
|----------------------------|---------------|-------------------|-----------------------------------|-----------|---------------------|------------|------------------------|----------------------------------------------------|-----------|-----------------------------|
| Generic Name               | Locus ID      | Size <sup>1</sup> | <i>Arabidopsis thaliana</i>       |           | <i>Oryza sativa</i> |            | PFAM Code              | Description                                        | Position  |                             |
| GmDEP#003                  | Glyma13g35120 | 522               | AtDEP1                            | At5g53850 | OsDEP#001           | Os11g29370 | PF00596                | Class II aldolase and adducin N-terminal domain    | 030 - 233 | Yang Cycle                  |
|                            |               |                   |                                   |           |                     |            | PF00702                | Haloacid dehalogenase-like hydrolase               | 280 - 493 |                             |
| GmGGT#001                  | Glyma01g00850 | 626               | AtGGT4                            | At4g29210 | OsGGT#001           | Os01g05810 | PF01019                | Gamma-glutamyltranspeptidase                       | 089 - 621 | GACC Synthesis <sup>4</sup> |
| GmGGT#002                  | Glyma07g15150 | 618               | AtGGT4                            | At4g29210 | OsGGT#001           | Os01g05810 | PF01019                | Gamma-glutamyltranspeptidase                       | 081 - 613 | GACC Synthesis <sup>4</sup> |
| GmGGT#003                  | Glyma11g35950 | 613               | AtGGT1                            | At4g39640 | OsGGT#003           | Os04g38450 | PF01019                | Gamma-glutamyltranspeptidase                       | 086 - 608 | GACC Synthesis <sup>4</sup> |
| GmGGT#004                  | Glyma11g35990 | 595               | AtGGT1                            | At4g39640 | OsGGT#003           | Os04g38450 | PF01019                | Gamma-glutamyltranspeptidase                       | 086 - 590 | GACC Synthesis <sup>4</sup> |
| GmGGT#005                  | Glyma18g02450 | 624               | AtGGT1                            | At4g39640 | OsGGT#003           | Os04g38450 | PF01019                | Gamma-glutamyltranspeptidase                       | 098 - 619 | GACC Synthesis <sup>4</sup> |
| GmMAT#001                  | Glyma02g01170 | 299               | AtMAT2                            | At4g01850 | OsMAT#002           | Os01g22010 | PF00438                | S-adenosylmethionine synthetase, N-terminal domain | 011 - 084 | Ethylene Biosynthesis       |
|                            |               |                   |                                   |           |                     |            | PF02772                | S-adenosylmethionine synthetase, central domain    | 099 - 164 |                             |
|                            |               |                   |                                   |           |                     |            | PF02773                | S-adenosylmethionine synthetase, C-terminal domain | 166 - 288 |                             |
| GmMAT#002                  | Glyma03g34120 | 390               | AtMAT3                            | At2g36880 | OsMAT#002           | Os01g22010 | PF00438                | S-adenosylmethionine synthetase, N-terminal domain | 002 - 101 | Ethylene Biosynthesis       |
|                            |               |                   |                                   |           |                     |            | PF02772                | S-adenosylmethionine synthetase, central domain    | 116 - 238 |                             |
|                            |               |                   |                                   |           |                     |            | PF02773                | S-adenosylmethionine synthetase, C-terminal domain | 240 - 382 |                             |
| GmMAT#003                  | Glyma03g38190 | 394               | AtMAT2                            | At4g01850 | OsMAT#002           | Os01g22010 | PF00438                | S-adenosylmethionine synthetase, N-terminal domain | 004 - 103 | Ethylene Biosynthesis       |
|                            |               |                   |                                   |           |                     |            | PF02772                | S-adenosylmethionine synthetase, central domain    | 118 - 240 |                             |
|                            |               |                   |                                   |           |                     |            | PF02773                | S-adenosylmethionine synthetase, C-terminal domain | 242 - 383 |                             |
| GmMAT#004                  | Glyma07g36150 | 392               | AtMAT4                            | At3g17390 | OsMAT#003           | Os05g04510 | PF00438                | S-adenosylmethionine synthetase, N-terminal domain | 003 - 102 | Ethylene Biosynthesis       |
|                            |               |                   |                                   |           |                     |            | PF02772                | S-adenosylmethionine synthetase, central domain    | 117 - 239 |                             |
|                            |               |                   |                                   |           |                     |            | PF02773                | S-adenosylmethionine synthetase, C-terminal domain | 241 - 383 |                             |
| GmMAT#005                  | Glyma10g06170 | 390               | AtMAT3                            | At2g36880 | OsMAT#001           | Os01g18860 | PF00438                | S-adenosylmethionine synthetase, N-terminal domain | 002 - 101 | Ethylene Biosynthesis       |
|                            |               |                   |                                   |           |                     |            | PF02772                | S-adenosylmethionine synthetase, central domain    | 116 - 238 |                             |
|                            |               |                   |                                   |           |                     |            | PF02773                | S-adenosylmethionine synthetase, C-terminal domain | 240 - 382 |                             |
| GmMAT#006                  | Glyma10g28500 | 389               | AtMAT2                            | At4g01850 | OsMAT#001           | Os01g18860 | PF00438                | S-adenosylmethionine synthetase, N-terminal domain | 002 - 101 | Ethylene Biosynthesis       |
|                            |               |                   |                                   |           |                     |            | PF02772                | S-adenosylmethionine synthetase, central domain    | 116 - 238 |                             |
|                            |               |                   |                                   |           |                     |            | PF02773                | S-adenosylmethionine synthetase, C-terminal domain | 240 - 382 |                             |
| GmMAT#007                  | Glyma13g20480 | 390               | AtMAT3                            | At2g36880 | OsMAT#001           | Os01g18860 | PF00438                | S-adenosylmethionine synthetase, N-terminal domain | 002 - 101 | Ethylene Biosynthesis       |
|                            |               |                   |                                   |           |                     |            | PF02772                | S-adenosylmethionine synthetase, central domain    | 116 - 238 |                             |
|                            |               |                   |                                   |           |                     |            | PF02773                | S-adenosylmethionine synthetase, C-terminal domain | 240 - 382 |                             |

**Table S5.** Soybean Ethylene Biosynthesis Protein Summary (cont.)

| <i>Glycine max</i> Protein |               |                   | Best Amino Acid Sequence Homology |           |                     |            | Soybean Protein Domain |                                                    |           | Pathway <sup>2</sup>  |
|----------------------------|---------------|-------------------|-----------------------------------|-----------|---------------------|------------|------------------------|----------------------------------------------------|-----------|-----------------------|
| Generic Name               | Locus ID      | Size <sup>1</sup> | <i>Arabidopsis thaliana</i>       |           | <i>Oryza sativa</i> |            | PFAM Code              | Description                                        | Position  |                       |
| GmMAT#008                  | Glyma15g21890 | 395               | AtMAT4                            | At3g17390 | OsMAT#002           | Os01g22010 | PF00438                | S-adenosylmethionine synthetase, N-terminal domain | 004 - 103 | Ethylene Biosynthesis |
|                            |               |                   |                                   |           |                     |            | PF02772                | S-adenosylmethionine synthetase, central domain    | 118 - 240 |                       |
|                            |               |                   |                                   |           |                     |            | PF02773                | S-adenosylmethionine synthetase, C-terminal domain | 242 - 384 |                       |
| GmMAT#009                  | Glyma17g04330 | 392               | AtMAT4                            | At3g17390 | OsMAT#003           | Os05g04510 | PF00438                | S-adenosylmethionine synthetase, N-terminal domain | 003 - 102 | Ethylene Biosynthesis |
|                            |               |                   |                                   |           |                     |            | PF02772                | S-adenosylmethionine synthetase, central domain    | 117 - 239 |                       |
|                            |               |                   |                                   |           |                     |            | PF02773                | S-adenosylmethionine synthetase, C-terminal domain | 241 - 383 |                       |
| GmMAT#010                  | Glyma17g04340 | 392               | AtMAT4                            | At3g17390 | OsMAT#003           | Os05g04510 | PF00438                | S-adenosylmethionine synthetase, N-terminal domain | 003 - 102 | Ethylene Biosynthesis |
|                            |               |                   |                                   |           |                     |            | PF02772                | S-adenosylmethionine synthetase, central domain    | 117 - 239 |                       |
|                            |               |                   |                                   |           |                     |            | PF02773                | S-adenosylmethionine synthetase, C-terminal domain | 241 - 383 |                       |
| GmMAT#011                  | Glyma19g40810 | 394               | AtMAT2                            | At4g01850 | OsMAT#002           | Os01g22010 | PF00438                | S-adenosylmethionine synthetase, N-terminal domain | 004 - 103 | Ethylene Biosynthesis |
|                            |               |                   |                                   |           |                     |            | PF02772                | S-adenosylmethionine synthetase, central domain    | 118 - 240 |                       |
|                            |               |                   |                                   |           |                     |            | PF02773                | S-adenosylmethionine synthetase, C-terminal domain | 242 - 383 |                       |
| GmMTI#001                  | Glyma09g08190 | 286               | AtMTI1                            | At2g05830 | OsMTI#001           | Os11g11050 | PF01008                | Initiation factor 2 subunit family                 | 054 - 272 | Yang Cycle            |
| GmMTI#002                  | Glyma15g19690 | 200               | AtMTI1                            | At2g05830 | OsMTI#001           | Os11g11050 | PF01008                | Initiation factor 2 subunit family                 | 001 - 189 | Yang Cycle            |
| GmMTK#001                  | Glyma01g45520 | 425               | AtMTK1                            | At1g49820 | OsMTK#001           | Os04g57400 | PF01636                | Phosphotransferase enzyme family                   | 037 - 251 | Yang Cycle            |
| GmMTK#002                  | Glyma10g40730 | 417               | AtMTK1                            | At1g49820 | OsMTK#001           | Os04g57400 | PF01636                | Phosphotransferase enzyme family                   | 036 - 296 | Yang Cycle            |
| GmMTK#003                  | Glyma20g26580 | 417               | AtMTK1                            | At1g49820 | OsMTK#001           | Os04g57400 | PF01636                | Phosphotransferase enzyme family                   | 036 - 296 | Yang Cycle            |
| GmMTN#001                  | Glyma04g00770 | 265               | AtMTN1                            | At4g38800 | OsMTN#001           | Os06g02220 | PF01048                | Phosphorylase superfamily                          | 026 - 255 | Yang Cycle            |
| GmMTN#002                  | Glyma06g00790 | 266               | AtMTN1                            | At4g38800 | OsMTN#001           | Os06g02220 | PF01048                | Phosphorylase superfamily                          | 027 - 256 | Yang Cycle            |
| GmMTN#003                  | Glyma06g00800 | 253               | AtMTN1                            | At4g38800 | OsMTN#001           | Os06g02220 | PF01048                | Phosphorylase superfamily                          | 014 - 243 | Yang Cycle            |

<sup>1</sup> Amino acid residues.

<sup>2</sup> This parameter was determined by homology with equivalent *Arabidopsis thaliana* amino acid sequence.

<sup>3</sup> Putative amino acid transferase (AAT). No ACC synthase activity demonstrated.

<sup>4</sup> The primary function of this protein is not initially associated with this metabolic pathway.

**Table S6.** Soybean Ethylene Signal Transduction Protein Summary

| <i>Glycine max</i> Protein |               |                   | Best Amino Acid Sequence Homology |           |                     |            | Soybean Protein Domain |                                            |           | Putative Function <sup>2</sup>          |
|----------------------------|---------------|-------------------|-----------------------------------|-----------|---------------------|------------|------------------------|--------------------------------------------|-----------|-----------------------------------------|
| Generic Name               | Locus ID      | Size <sup>1</sup> | <i>Arabidopsis thaliana</i>       |           | <i>Oryza sativa</i> |            | PFAM Code              | Description                                | Position  |                                         |
| GmCPK#001                  | Glyma04g38150 | 496               | AtCDPK2                           | At1g35670 | OsCPK#001           | Os11g07040 | PF00069                | Protein kinase domain                      | 030 - 288 | ACS Type II Activation                  |
|                            |               |                   |                                   |           |                     |            | PF00036                | EF hand                                    | 335 - 396 |                                         |
|                            |               |                   |                                   |           |                     |            |                        |                                            | 401 - 466 |                                         |
| GmCPK#002                  | Glyma05g33240 | 507               | AtCDPK2                           | At1g35670 | OsCPK#001           | Os11g07040 | PF00069                | Protein kinase domain                      | 033 - 291 | ACS Type II Activation                  |
|                            |               |                   |                                   |           |                     |            | PF00036                | EF hand                                    | 338 - 399 |                                         |
|                            |               |                   |                                   |           |                     |            |                        |                                            | 404 - 469 |                                         |
| GmCPK#003                  | Glyma06g16920 | 497               | AtCDPK2                           | At1g35670 | OsCPK#001           | Os11g07040 | PF00069                | Protein kinase domain                      | 031 - 289 | ACS Type II Activation                  |
|                            |               |                   |                                   |           |                     |            | PF00036                | EF hand                                    | 336 - 397 |                                         |
|                            |               |                   |                                   |           |                     |            |                        |                                            | 402 - 467 |                                         |
| GmCPK#004                  | Glyma08g00840 | 508               | AtCDPK2                           | At1g35670 | OsCPK#001           | Os11g07040 | PF00069                | Protein kinase domain                      | 034 - 292 | ACS Type II Activation                  |
|                            |               |                   |                                   |           |                     |            | PF00036                | EF hand                                    | 339 - 400 |                                         |
|                            |               |                   |                                   |           |                     |            |                        |                                            | 405 - 470 |                                         |
| GmCPK#005                  | Glyma10g36090 | 482               | AtCDPK2                           | At1g35670 | OsCPK#002           | Os12g07230 | PF00069                | Protein kinase domain                      | 021 - 279 | ACS Type II Activation                  |
|                            |               |                   |                                   |           |                     |            | PF00036                | EF hand                                    | 326 - 387 |                                         |
|                            |               |                   |                                   |           |                     |            |                        |                                            | 392 - 457 |                                         |
| GmCTR#001                  | Glyma02g27680 | 660               | AtCTR1                            | At5g03730 | OsCTR#001           | Os02g32610 | PF14381                | Ethylene responsive protein kinase Le-CTR1 | 064 - 273 | Negative Regulator of Ethylene Response |
|                            |               |                   |                                   |           |                     |            | PF07714                | Protein tyrosine kinase                    | 397 - 651 |                                         |
| GmCTR#002                  | Glyma03g34890 | 803               | AtCTR1                            | At5g03730 | OsCTR#001           | Os02g32610 | PF14381                | Ethylene responsive protein kinase Le-CTR1 | 172 - 371 | Negative Regulator of Ethylene Response |
|                            |               |                   |                                   |           |                     |            | PF07714                | Protein tyrosine kinase                    | 529 - 783 |                                         |
| GmCTR#003                  | Glyma10g07610 | 793               | AtCTR1                            | At5g03730 | OsCTR#001           | Os02g32610 | PF14381                | Ethylene responsive protein kinase Le-CTR1 | 197 - 396 | Negative Regulator of Ethylene Response |
|                            |               |                   |                                   |           |                     |            | PF07714                | Protein tyrosine kinase                    | 505 - 760 |                                         |
| GmCTR#004                  | Glyma13g21480 | 836               | AtCTR1                            | At5g03730 | OsCTR#001           | Os02g32610 | PF14381                | Ethylene responsive protein kinase Le-CTR1 | 176 - 386 | Negative Regulator of Ethylene Response |
|                            |               |                   |                                   |           |                     |            | PF07714                | Protein tyrosine kinase                    | 562 - 816 |                                         |
| GmCTR#005                  | Glyma19g37570 | 803               | AtCTR1                            | At5g03730 | OsCTR#001           | Os02g32610 | PF14381                | Ethylene responsive protein kinase Le-CTR1 | 167 - 376 | Negative Regulator of Ethylene Response |
|                            |               |                   |                                   |           |                     |            | PF07714                | Protein tyrosine kinase                    | 529 - 783 |                                         |
| GmEBF#001                  | Glyma04g07110 | 636               | AtEBF1                            | At2g25490 | OsEBF#001           | Os02g10700 | PF00646                | F-box domain                               | 065 - 113 | Directs EIN3 to Proteolysis             |
| GmEBF#002                  | Glyma04g20330 | 650               | AtEBF1                            | At2g25490 | OsEBF#001           | Os02g10700 | PF00646                | F-box domain                               | 068 - 106 | Directs EIN3 to Proteolysis             |
| GmEBF#003                  | Glyma06g07200 | 638               | AtEBF1                            | At2g25490 | OsEBF#001           | Os02g10700 | PF00646                | F-box domain                               | 067 - 114 | Directs EIN3 to Proteolysis             |
| GmEBF#004                  | Glyma13g23510 | 639               | AtEBF1                            | At2g25490 | OsEBF#001           | Os02g10700 | PF00646                | F-box domain                               | 065 - 103 | Directs EIN3 to Proteolysis             |
| GmEBF#005                  | Glyma14g14410 | 644               | AtEBF1                            | At2g25490 | OsEBF#001           | Os02g10700 | PF00646                | F-box domain                               | 065 - 111 | Directs EIN3 to Proteolysis             |

**Table S6. Soybean Ethylene Signal Transduction Protein Summary (cont.)**

| <i>Glycine max</i> Protein |               |                   | Best Amino Acid Sequence Homology |           |                     |            | Soybean Protein Domain |                                                      |           | Putative Function <sup>2</sup> |
|----------------------------|---------------|-------------------|-----------------------------------|-----------|---------------------|------------|------------------------|------------------------------------------------------|-----------|--------------------------------|
| Generic Name               | Locus ID      | Size <sup>1</sup> | <i>Arabidopsis thaliana</i>       |           | <i>Oryza sativa</i> |            | PFAM Code              | Description                                          | Position  |                                |
| GmEBF#006                  | Glyma17g12270 | 639               | AtEBF1                            | At2g25490 | OsEBF#001           | Os02g10700 | PF00646                | F-box domain                                         | 065 - 103 | Directs EIN3 to Proteolysis    |
| GmEBF#007                  | Glyma17g31940 | 610               | AtEBF1                            | At2g25490 | OsEBF#001           | Os02g10700 | PF00646                | F-box domain                                         | 067 - 106 | Directs EIN3 to Proteolysis    |
| GmEIN#001                  | Glyma02g44220 | 614               | AtEIN3                            | At3g20770 | OsEIN#002           | Os03g20780 | PF04873                | Ethylene insensitive 3                               | 048 - 426 | Nuclear Transcription Factor   |
| GmEIN#002                  | Glyma03g33850 | 1281              | AtEIN2                            | At5g03280 | OsEIN#006           | Os07g06130 | PF01566                | Natural resistance-associated macrophage protein     | 038 - 392 | Acts Downstream of CTR1        |
| GmEIN#003                  | Glyma03g40500 | 966               | AtEIN5                            | At1g54490 | OsEIN#005           | Os03g58060 | PF03159                | XRN 5'-3' exonuclease N-terminus                     | 001 - 257 | EBF RNA Silencing              |
|                            |               |                   |                                   |           |                     |            | PF00098                | Zinc knuckle                                         | 264 - 281 |                                |
| GmEIN#004                  | Glyma10g06610 | 1298              | AtEIN2                            | At5g03280 | OsEIN#006           | Os07g06130 | PF01566                | Natural resistance-associated macrophage protein     | 038 - 392 | Acts Downstream of CTR1        |
| GmEIN#005                  | Glyma13g03660 | 618               | AtEIN3                            | At3g20770 | OsEIN#003           | Os03g20790 | PF04873                | Ethylene insensitive 3                               | 049 - 426 | Nuclear Transcription Factor   |
| GmEIN#006                  | Glyma13g03700 | 621               | AtEIN3                            | At3g20770 | OsEIN#002           | Os03g20780 | PF04873                | Ethylene insensitive 3                               | 049 - 427 | Nuclear Transcription Factor   |
| GmEIN#007                  | Glyma13g20810 | 1334              | AtEIN2                            | At5g03280 | OsEIN#006           | Os07g06130 | PF01566                | Natural resistance-associated macrophage protein     | 038 - 392 | Acts Downstream of CTR1        |
| GmEIN#008                  | Glyma14g04550 | 610               | AtEIN3                            | At3g20770 | OsEIN#003           | Os03g20790 | PF04873                | Ethylene insensitive 3                               | 048 - 426 | Nuclear Transcription Factor   |
| GmEIN#009                  | Glyma19g43160 | 957               | AtEIN5                            | At1g54490 | OsEIN#005           | Os03g58060 | PF03159                | XRN 5'-3' exonuclease N-terminus                     | 001 - 255 | EBF RNA Silencing              |
|                            |               |                   |                                   |           |                     |            | PF00098                | Zinc knuckle                                         | 262 - 279 |                                |
| GmEIN#010                  | Glyma20g12250 | 624               | AtEIN3                            | At3g20770 | OsEIN#002           | Os03g20780 | PF04873                | Ethylene insensitive 3                               | 048 - 423 | Nuclear Transcription Factor   |
| GmEIN#011                  | Glyma20g37260 | 932               | AtEIN5                            | At1g54490 | OsEIN#005           | Os03g58060 | PF03159                | XRN 5'-3' exonuclease N-terminus                     | 001 - 256 | EBF RNA Silencing              |
|                            |               |                   |                                   |           |                     |            | PF00098                | Zinc knuckle                                         | 263 - 280 |                                |
| GmETO#001                  | Glyma01g31170 | 954               | AtETO1                            | At3g51770 | OsETO#001           | Os03g18360 | PF13414                | TPR repeat                                           | 871 - 934 | ACS Type II Negative Regulator |
| GmETO#002                  | Glyma02g16310 | 886               | AtEOL1                            | At4g02680 | OsETO#003           | Os11g37520 | PF00515                | Tetratricopeptide repeat                             | 709 - 742 | ACS Type II Negative Regulator |
| GmETO#003                  | Glyma02g39460 | 937               | AtETO1                            | At3g51770 | OsETO#001           | Os03g18360 | PF07719                | Tetratricopeptide repeat                             | 560 - 593 | ACS Type II Negative Regulator |
| GmETO#004                  | Glyma03g06600 | 960               | AtETO1                            | At3g51770 | OsETO#001           | Os03g18360 | PF13414                | TPR repeat                                           | 875 - 940 | ACS Type II Negative Regulator |
| GmETO#005                  | Glyma03g31370 | 888               | AtEOL1                            | At4g02680 | OsETO#002           | Os07g08120 | PF13414                | TPR repeat                                           | 709 - 777 | ACS Type II Negative Regulator |
| GmETO#006                  | Glyma10g03520 | 887               | AtEOL1                            | At4g02680 | OsETO#003           | Os11g37520 | PF00515                | Tetratricopeptide repeat                             | 710 - 743 | ACS Type II Negative Regulator |
| GmETO#007                  | Glyma11g29000 | 935               | AtETO1                            | At3g51770 | OsETO#001           | Os03g18360 | PF13414                | TPR repeat                                           | 853 - 918 | ACS Type II Negative Regulator |
| GmETO#008                  | Glyma14g37640 | 924               | AtETO1                            | At3g51770 | OsETO#001           | Os03g18360 | PF13414                | TPR repeat                                           | 745 - 810 | ACS Type II Negative Regulator |
| GmETO#009                  | Glyma18g06680 | 873               | AtETO1                            | At3g51770 | OsETO#001           | Os03g18360 | PF13414                | TPR repeat                                           | 742 - 807 | ACS Type II Negative Regulator |
| GmETO#010                  | Glyma19g34200 | 886               | AtEOL1                            | At4g02680 | OsETO#003           | Os11g37520 | PF13414                | TPR repeat                                           | 707 - 772 | ACS Type II Negative Regulator |
| GmETR#001                  | Glyma03g37470 | 636               | AtERS1                            | At2g40940 | OsETR#002           | Os03g49500 | PF01590                | GAF domain                                           | 159 - 308 | Ethylene Receptor              |
|                            |               |                   |                                   |           |                     |            | PF00512                | Histidine kinase A (phosphoacceptor) domain          | 344 - 409 |                                |
|                            |               |                   |                                   |           |                     |            | PF02518                | Histidine kinase, DNA gyrase B and HSP90-like ATPase | 456 - 587 |                                |

**Table S6. Soybean Ethylene Signal Transduction Protein Summary (cont.)**

| <i>Glycine max</i> Protein |               |                   | Best Amino Acid Sequence Homology |           |                     |            | Soybean Protein Domain |                                                      |           | Putative Function <sup>2</sup> |
|----------------------------|---------------|-------------------|-----------------------------------|-----------|---------------------|------------|------------------------|------------------------------------------------------|-----------|--------------------------------|
| Generic Name               | Locus ID      | Size <sup>1</sup> | <i>Arabidopsis thaliana</i>       |           | <i>Oryza sativa</i> |            | PFAM Code              | Description                                          | Position  |                                |
| GmETR#002                  | Glyma03g41220 | 760               | AtEIN4                            | At3g04580 | OsETR#003           | Os04g08740 | PF01590                | GAF domain                                           | 183 - 334 | Ethylene Receptor              |
|                            |               |                   |                                   |           |                     |            | PF00512                | Histidine kinase A (phosphoacceptor) domain          | 370 - 435 |                                |
|                            |               |                   |                                   |           |                     |            | PF00072                | Response regulator receiver domain                   | 636 - 750 |                                |
| GmETR#003                  | Glyma09g00490 | 740               | AtETR1                            | At1g66340 | OsETR#002           | Os03g49500 | PF01590                | GAF domain                                           | 158 - 307 | Ethylene Receptor              |
|                            |               |                   |                                   |           |                     |            | PF00512                | Histidine kinase A (phosphoacceptor) domain          | 343 - 408 |                                |
|                            |               |                   |                                   |           |                     |            | PF02518                | Histidine kinase, DNA gyrase B and HSP90-like ATPase | 455 - 586 |                                |
|                            |               |                   |                                   |           |                     |            | PF00072                | Response regulator receiver domain                   | 616 - 728 |                                |
| GmETR#004                  | Glyma10g31040 | 767               | AtEIN4                            | At3g04580 | OsETR#003           | Os04g08740 | PF01590                | GAF domain                                           | 192 - 341 | Ethylene Receptor              |
|                            |               |                   |                                   |           |                     |            | PF00512                | Histidine kinase A (phosphoacceptor) domain          | 377 - 442 |                                |
|                            |               |                   |                                   |           |                     |            | PF00072                | Response regulator receiver domain                   | 643 - 757 |                                |
| GmETR#005                  | Glyma10g33240 | 751               | AtETR2                            | At3g23150 | OsETR#003           | Os04g08740 | PF01590                | GAF domain                                           | 182 - 331 | Ethylene Receptor              |
|                            |               |                   |                                   |           |                     |            | PF00512                | Histidine kinase A (phosphoacceptor) domain          | 367 - 432 |                                |
|                            |               |                   |                                   |           |                     |            | PF00072                | Response regulator receiver domain                   | 627 - 741 |                                |
| GmETR#006                  | Glyma12g37050 | 739               | AtETR1                            | At1g66340 | OsETR#002           | Os03g49500 | PF01590                | GAF domain                                           | 158 - 307 | Ethylene Receptor              |
|                            |               |                   |                                   |           |                     |            | PF00512                | Histidine kinase A (phosphoacceptor) domain          | 343 - 408 |                                |
|                            |               |                   |                                   |           |                     |            | PF02518                | Histidine kinase, DNA gyrase B and HSP90-like ATPase | 455 - 585 |                                |
|                            |               |                   |                                   |           |                     |            | PF00072                | Response regulator receiver domain                   | 615 - 727 |                                |
| GmETR#007                  | Glyma19g40090 | 636               | AtERS1                            | At2g40940 | OsETR#002           | Os03g49500 | PF01590                | GAF domain                                           | 159 - 308 | Ethylene Receptor              |
|                            |               |                   |                                   |           |                     |            | PF00512                | Histidine kinase A (phosphoacceptor) domain          | 344 - 409 |                                |
|                            |               |                   |                                   |           |                     |            | PF02518                | Histidine kinase, DNA gyrase B and HSP90-like ATPase | 456 - 587 |                                |
| GmETR#008                  | Glyma19g43840 | 731               | AtEIN4                            | At3g04580 | OsETR#003           | Os04g08740 | PF01590                | GAF domain                                           | 183 - 333 | Ethylene Receptor              |
|                            |               |                   |                                   |           |                     |            | PF00512                | Histidine kinase A (phosphoacceptor) domain          | 369 - 434 |                                |
|                            |               |                   |                                   |           |                     |            | PF00072                | Response regulator receiver domain                   | 635 - 713 |                                |
| GmETR#009                  | Glyma20g21780 | 682               | AtETR2                            | At3g23150 | OsETR#003           | Os04g08740 | PF01590                | GAF domain                                           | 186 - 332 | Ethylene Receptor              |
|                            |               |                   |                                   |           |                     |            | PF00512                | Histidine kinase A (phosphoacceptor) domain          | 368 - 433 |                                |
|                            |               |                   |                                   |           |                     |            | PF00072                | Response regulator receiver domain                   | 559 - 672 |                                |
| GmETR#010                  | Glyma20g34420 | 798               | AtETR2                            | At3g23150 | OsETR#003           | Os04g08740 | PF01590                | GAF domain                                           | 182 - 331 | Ethylene Receptor              |
|                            |               |                   |                                   |           |                     |            | PF00512                | Histidine kinase A (phosphoacceptor) domain          | 367 - 432 |                                |
|                            |               |                   |                                   |           |                     |            | PF00072                | Response regulator receiver domain                   | 674 - 788 |                                |



**Table S6. Soybean Ethylene Signal Transduction Protein Summary (cont.)**

| <i>Glycine max</i> Protein |               |                   | Best Amino Acid Sequence Homology |           |                     |            | Soybean Protein Domain |                                             |           | Putative Function <sup>2</sup>          |
|----------------------------|---------------|-------------------|-----------------------------------|-----------|---------------------|------------|------------------------|---------------------------------------------|-----------|-----------------------------------------|
| Generic Name               | Locus ID      | Size <sup>1</sup> | <i>Arabidopsis thaliana</i>       |           | <i>Oryza sativa</i> |            | PFAM Code              | Description                                 | Position  |                                         |
| GmETR#011                  | Glyma20g36440 | 734               | AtEIN4                            | At3g04580 | OsETR#003           | Os04g08740 | PF01590                | GAF domain                                  | 159 - 308 | Ethylene Receptor                       |
|                            |               |                   |                                   |           |                     |            | PF00512                | Histidine kinase A (phosphoacceptor) domain | 344 - 409 |                                         |
|                            |               |                   |                                   |           |                     |            | PF00072                | Response regulator receiver domain          | 610 - 724 |                                         |
| GmMKK#001                  | Glyma07g00520 | 351               | AtMKK4                            | At1g51660 | OsMKK#005           | Os06g09180 | PF00069                | Protein kinase domain                       | 069 - 324 | ACS Type I Activation                   |
| GmMKK#002                  | Glyma07g11910 | 318               | AtMKK9                            | At1g73500 | OsMKK#003           | Os03g12390 | PF00069                | Protein kinase domain                       | 049 - 311 | EIN3 Activation                         |
| GmMKK#003                  | Glyma08g23900 | 364               | AtMKK4                            | At1g51660 | OsMKK#005           | Os06g09180 | PF00069                | Protein kinase domain                       | 082 - 337 | ACS Type I Activation                   |
| GmMKK#004                  | Glyma09g30300 | 319               | AtMKK9                            | At1g73500 | OsMKK#003           | Os03g12390 | PF00069                | Protein kinase domain                       | 050 - 312 | EIN3 Activation                         |
| GmMPK#001                  | Glyma02g15690 | 391               | AtMPK6                            | At2g43790 | OsMPK#002           | Os06g06090 | PF00069                | Protein kinase domain                       | 061 - 344 | ACS Type I/EIN3 Activation              |
| GmMPK#002                  | Glyma07g32750 | 433               | AtMPK6                            | At2g43790 | OsMPK#002           | Os06g06090 | PF00069                | Protein kinase domain                       | 103 - 386 | ACS Type I/EIN3 Activation              |
| GmMPK#003                  | Glyma11g15700 | 371               | AtMPK3                            | At3g45640 | OsMPK#001           | Os03g17700 | PF00069                | Protein kinase domain                       | 041 - 325 | EIN3 Activation                         |
| GmMPK#004                  | Glyma12g07770 | 371               | AtMPK3                            | At3g45640 | OsMPK#001           | Os03g17700 | PF00069                | Protein kinase domain                       | 041 - 325 | EIN3 Activation                         |
| GmRAN#001                  | Glyma04g07350 | 221               | AtRAN3                            | At5g55190 | OsRAN#001           | Os05g49890 | PF00071                | Ras family                                  | 015 - 173 | Copper Transporter                      |
| GmRAN#002                  | Glyma04g07360 | 221               | AtRAN3                            | At5g55190 | OsRAN#001           | Os05g49890 | PF00071                | Ras family                                  | 015 - 173 | Copper Transporter                      |
| GmRAN#003                  | Glyma04g07370 | 221               | AtRAN3                            | At5g55190 | OsRAN#001           | Os05g49890 | PF00071                | Ras family                                  | 015 - 173 | Copper Transporter                      |
| GmRAN#004                  | Glyma05g08260 | 221               | AtRAN3                            | At5g55190 | OsRAN#001           | Os05g49890 | PF00071                | Ras family                                  | 015 - 173 | Copper Transporter                      |
| GmRAN#005                  | Glyma06g07400 | 221               | AtRAN3                            | At5g55190 | OsRAN#001           | Os05g49890 | PF00071                | Ras family                                  | 015 - 173 | Copper Transporter                      |
| GmRAN#006                  | Glyma06g07410 | 221               | AtRAN3                            | At5g55190 | OsRAN#001           | Os05g49890 | PF00071                | Ras family                                  | 015 - 173 | Copper Transporter                      |
| GmRAN#007                  | Glyma06g07420 | 221               | AtRAN3                            | At5g55190 | OsRAN#001           | Os05g49890 | PF00071                | Ras family                                  | 015 - 173 | Copper Transporter                      |
| GmRTE#001                  | Glyma01g37560 | 231               | AtRTH1                            | At3g51040 | OsRTE#002           | Os03g58520 | PF05608                | Protein of unknown function (DUF778)        | 040 - 175 | Positive Regulator of Ethylene Receptor |
| GmRTE#002                  | Glyma11g07740 | 230               | AtRTH1                            | At3g51040 | OsRTE#002           | Os03g58520 | PF05608                | Protein of unknown function (DUF778)        | 039 - 174 | Positive Regulator of Ethylene Receptor |
| GmRTE#003                  | Glyma14g10770 | 235               | AtRTE1                            | At2g26070 | OsRTE#001           | Os01g51430 | PF05608                | Protein of unknown function (DUF778)        | 044 - 179 | Positive Regulator of Ethylene Receptor |
| GmRTE#004                  | Glyma17g34740 | 235               | AtRTE1                            | At2g26070 | OsRTE#001           | Os01g51430 | PF05608                | Protein of unknown function (DUF778)        | 044 - 179 | Positive Regulator of Ethylene Receptor |

<sup>1</sup> Amino acid residues.

<sup>2</sup> This parameter was determined by homology with equivalent *Arabidopsis thaliana* amino acid sequence.

**Table S7. BBH Experiment - Soybean Ethylene Biosynthesis Proteins<sup>1,2</sup>**

| <i>Glycine max</i> Protein |               | <i>Arabidopsis thaliana</i> Protein |           | <i>Oryza sativa</i> Protein |            |
|----------------------------|---------------|-------------------------------------|-----------|-----------------------------|------------|
| Generic Name               | Locus ID      | Generic Name                        | Locus ID  | Generic Name                | Locus ID   |
| GmAAT#001                  | Glyma02g01830 | –                                   | –         | OsAAT#002                   | Os10g34350 |
| GmAAT#004                  | Glyma06g11640 | AtAAT                               | At1g77670 | OsAAT#001                   | Os09g28050 |
| GmACD#001                  | Glyma05g33540 | AtACD1                              | At1g48420 | OsACD#001                   | Os02g53330 |
| GmACO#004                  | Glyma04g42460 | AtACO#002                           | At1g77330 | OsACO#003                   | Os05g05680 |
| GmACO#006                  | Glyma06g12340 | AtACO#002                           | At1g77330 | OsACO#003                   | Os05g05680 |
| GmACO#007                  | Glyma07g15480 | AtACO1                              | At2g19590 | –                           | –          |
| GmACO#008                  | Glyma07g39420 | –                                   | –         | OsACO#005                   | Os09g27750 |
| GmACO#009                  | Glyma08g03310 | –                                   | –         | OsACO#004                   | Os06g37590 |
| GmACO#014                  | Glyma14g05390 | AtACO4                              | At1g05010 | –                           | –          |
| GmACS#006                  | Glyma05g36250 | AtACS7                              | At4g26200 | –                           | –          |
| GmACS#011                  | Glyma08g02130 | AtACS6                              | At4g11280 | OsACS#003                   | Os04g48850 |
| GmACS#012                  | Glyma08g03400 | –                                   | –         | OsACS#004                   | Os05g10780 |
| GmACS#013                  | Glyma09g28000 | AtACS12                             | At5g51690 | OsACS#006                   | Os06g03990 |
| GmACS#014                  | Glyma09g39060 | AtACS1                              | At3g61510 | –                           | –          |
| GmACS#016                  | Glyma11g03070 | AtACS10                             | At1g62960 | –                           | –          |
| GmACS#017                  | Glyma11g04890 | AtACS8                              | At4g37770 | –                           | –          |
| GmACS#020                  | Glyma17g16990 | –                                   | –         | OsACS#002                   | Os03g51740 |
| GmACT#003                  | Glyma08g27500 | AtACT#001                           | At1g03940 | –                           | –          |
| GmACT#006                  | Glyma12g32630 | AtACT#002                           | At1g03495 | –                           | –          |
| GmACT#017                  | Glyma18g06500 | AtACT#003                           | At2g30200 | OsACT#002                   | Os03g18590 |
| GmACT#020                  | Glyma18g50320 | AtACT#005                           | At5g39050 | –                           | –          |
| GmACT#023                  | Glyma18g50350 | –                                   | –         | OsACT#001                   | Os02g57480 |
| GmARD#001                  | Glyma10g38940 | –                                   | –         | OsARD#001                   | Os03g06620 |
| GmARD#002                  | Glyma10g38960 | AtARD4                              | At5g43850 | OsARD#004                   | Os10g28360 |
| GmARD#004                  | Glyma20g28860 | AtARD2                              | At4g14710 | –                           | –          |
| GmASP#002                  | Glyma06g08670 | AtASP3                              | At5g11520 | OsASP#001                   | Os01g55540 |
| GmASP#004                  | Glyma17g33050 | AtASP5                              | At4g31990 | OsASP#003                   | Os02g55420 |
| GmDEP#001                  | Glyma06g36620 | AtDEP1                              | At5g53850 | –                           | –          |
| GmDEP#002                  | Glyma12g35390 | –                                   | –         | OsDEP#001                   | Os11g29370 |
| GmGGT#001                  | Glyma01g00850 | AtGGT4                              | At4g29210 | OsGGT#001                   | Os01g05810 |
| GmGGT#003                  | Glyma11g35950 | AtGGT1                              | At4g39640 | OsGGT#003                   | Os04g38450 |
| GmMAT#007                  | Glyma13g20480 | AtMAT3                              | At2g36880 | –                           | –          |
| GmMAT#008                  | Glyma15g21890 | AtMAT4                              | At3g17390 | –                           | –          |
| GmMAT#009                  | Glyma17g04330 | –                                   | –         | OsMAT#003                   | Os05g04510 |
| GmMAT#011                  | Glyma19g40810 | AtMAT2                              | At4g01850 | OsMAT#002                   | Os01g22010 |
| GmMTI#001                  | Glyma09g08190 | AtMTI1                              | At2g05830 | OsMTI#001                   | Os11g11050 |
| GmMTI#002                  | Glyma15g19690 | AtMTI1                              | At2g05830 | –                           | –          |
| GmMTK#003                  | Glyma20g26580 | AtMTK1                              | At1g49820 | OsMTK#001                   | Os04g57400 |
| GmMTN#001                  | Glyma04g00770 | AtMTN1                              | At4g38800 | –                           | –          |
| GmMTN#002                  | Glyma06g00790 | –                                   | –         | OsMTN#001                   | Os06g02220 |

<sup>1</sup> Soybean ethylene biosynthesis proteins that have a homologous BBH positive with *Arabidopsis thaliana* and/or *Oryza sativa*.

<sup>2</sup> BBH: Best Bidirectional Hit.

**Table S8. BBH Experiment - Soybean Proteins Related with Ethylene Signal Transduction<sup>1,2</sup>**

| <i>Glycine max</i> Protein |               | <i>Arabidopsis thaliana</i> Protein |           | <i>Oryza sativa</i> Protein |            |
|----------------------------|---------------|-------------------------------------|-----------|-----------------------------|------------|
| Generic Name               | Locus ID      | Generic Name                        | Locus ID  | Generic Name                | Locus ID   |
| GmCPK#004                  | Glyma08g00840 | –                                   | –         | OsCPK#001                   | Os11g07040 |
| GmCTR#004                  | Glyma13g21480 | AtCTR1                              | At5g03730 | OsCTR#001                   | Os02g32610 |
| GmEBF#005                  | Glyma14g14410 | AtEBF1                              | At2g25490 | OsEBF#001                   | Os02g10700 |
| GmEIN#007                  | Glyma13g20810 | AtEIN2                              | At5g03280 | OsEIN#006                   | Os07g06130 |
| GmEIN#008                  | Glyma14g04550 | –                                   | –         | OsEIN#003                   | Os03g20790 |
| GmEIN#009                  | Glyma19g43160 | AtEIN5                              | At1g54490 | –                           | –          |
| GmEIN#010                  | Glyma20g12250 | AtEIN3                              | At3g20770 | OsEIN#002                   | Os03g20780 |
| GmEIN#011                  | Glyma20g37260 | –                                   | –         | OsEIN#005                   | Os03g58060 |
| GmETO#001                  | Glyma01g31170 | AtETO1                              | At3g51770 | OsETO#001                   | Os03g18360 |
| GmETO#002                  | Glyma02g16310 | –                                   | –         | OsETO#003                   | Os11g37520 |
| GmETO#010                  | Glyma19g34200 | AtEOL1                              | At4g02680 | –                           | –          |
| GmETR#002                  | Glyma03g41220 | AtEIN4                              | At3g04580 | OsETR#003                   | Os04g08740 |
| GmETR#003                  | Glyma09g00490 | –                                   | –         | OsETR#002                   | Os03g49500 |
| GmETR#006                  | Glyma12g37050 | AtETR1                              | At1g66340 | –                           | –          |
| GmETR#007                  | Glyma19g40090 | AtERS1                              | At2g40940 | –                           | –          |
| GmETR#010                  | Glyma20g34420 | AtETR2                              | At3g23150 | –                           | –          |
| GmMKK#001                  | Glyma07g00520 | AtMKK4                              | At1g51660 | OsMKK#005                   | Os06g09180 |
| GmMKK#002                  | Glyma07g11910 | AtMKK9                              | At1g73500 | OsMKK#001                   | Os03g12390 |
| GmMPK#001                  | Glyma02g15690 | AtMPK6                              | At2g43790 | OsMPK#002                   | Os06g06090 |
| GmMPK#004                  | Glyma12g07770 | AtMPK3                              | At3g45640 | OsMPK#001                   | Os03g17700 |
| GmRAN#002                  | Glyma04g07360 | –                                   | –         | OsRAN#001                   | Os05g49890 |
| GmRAN#003                  | Glyma04g07370 | –                                   | –         | OsRAN#001                   | Os05g49890 |
| GmRAN#005                  | Glyma06g07400 | AtRAN3                              | At5g55190 | –                           | –          |
| GmRAN#006                  | Glyma06g07410 | –                                   | –         | OsRAN#001                   | Os05g49890 |
| GmRTE#002                  | Glyma11g07740 | AtRTH1                              | At3g51040 | OsRTE#002                   | Os03g58520 |
| GmRTE#003                  | Glyma14g10770 | AtRTE1                              | At2g26070 | OsRTE#001                   | Os01g51430 |

<sup>1</sup> Soybean proteins related with ethylene signal transduction that have a homologous BBH positive with *Arabidopsis thaliana* and/or *Oryza sativa*.

<sup>2</sup> BBH: Best Bidirectional Hit.
