# Supplementary material for: Implications of ethylene biosynthesis and signaling in soybean drought stress tolerance
Source: PubMed Central journal article supplement (PMC4557918; doi:10.1186/s12870-015-0597-z), 2015-09-03
Supplement: 12870_2015_597_MOESM5_ESM.pdf [file 12870_2015_597_MOESM5_ESM.pdf]

**Table S10.** Target and Endogenous Gene Cycle Threshold in Soybean Leaf Under Drought Stress – RT-qPCR<sup>1</sup>

| Symbol | Generic Name | c.D. <sup>2</sup> | Time of Drought Stress (minute) |                  |                   |                  |                   |                  |                   |                  |                   |                  |                   |                  |                   |                  |
|--------|--------------|-------------------|---------------------------------|------------------|-------------------|------------------|-------------------|------------------|-------------------|------------------|-------------------|------------------|-------------------|------------------|-------------------|------------------|
|        |              |                   | 0                               |                  | 25                |                  | 50                |                  | 75                |                  | 100               |                  | 125               |                  | 150               |                  |
|        |              |                   | BR16 <sup>3</sup>               | E48 <sup>4</sup> | BR16 <sup>3</sup> | E48 <sup>4</sup> | BR16 <sup>3</sup> | E48 <sup>4</sup> | BR16 <sup>3</sup> | E48 <sup>4</sup> | BR16 <sup>3</sup> | E48 <sup>4</sup> | BR16 <sup>3</sup> | E48 <sup>4</sup> | BR16 <sup>3</sup> | E48 <sup>4</sup> |
| ACO    | GmACO#012    | 1:80              | 22.1±0.2                        | 23.4±1.1         | 20.6±0.4          | 22.4±0.4         | 21.6±0.4          | 22.5±0.5         | 22.3±0.4          | 22.5±0.2         | 22.1±0.1          | 20.7±0.1         | 20.6±0.4          | 19.9±0.1         | 18.9±0.1          | 20.6±0.1         |
| ACS    | GmACS#006    | 1:40              | 30.9±0.2                        | 35.0±0.8         | 29.8±0.2          | 30.2±0.2         | 29.5±0.2          | 31.4±0.1         | 31.1±0.1          | 31.3±0.2         | 30.4±0.2          | 30.7±0.6         | 31.4±0.3          | 32.9±1.2         | 32.4±0.4          | 33.2±0.4         |
| CTR    | GmCTR#003    | 1:40              | 30.2±0.1                        | 30.6±0.1         | 29.9±0.1          | 30.7±0.1         | 30.9±0.2          | 30.5±0.1         | 31.1±0.1          | 30.4±0.1         | 31.2±0.2          | 29.8±0.2         | 30.0±0.2          | 31.9±0.1         | 31.1±0.1          | 31.8±0.1         |
| ETR    | GmETR#007    | 1:40              | 21.9±0.3                        | 22.9±0.2         | 22.0±0.1          | 22.3±0.1         | 22.7±0.4          | 22.5±0.1         | 22.7±0.3          | 22.1±0.3         | 23.3±0.1          | 22.2±0.2         | 22.3±0.2          | 22.3±0.1         | 20.6±0.1          | 22.6±0.7         |
| MAT    | GmMAT#008    | 1:80              | 19.2±0.2                        | 19.3±0.4         | 17.9±0.3          | 19.0±0.2         | 18.7±0.1          | 18.8±0.1         | 18.1±0.3          | 18.5±0.2         | 19.6±0.1          | 17.2±0.3         | 17.7±0.3          | 19.4±0.5         | 17.8±0.4          | 18.0±0.2         |
| –      | ACT11        | 1:40              | 18.4±0.5                        | 18.9±0.8         | 17.7±0.6          | 18.3±0.1         | 18.5±0.4          | 18.5±0.1         | 19.1±0.5          | 18.4±0.2         | 18.7±1.2          | 18.1±0.6         | 18.8±0.3          | 19.7±0.5         | 19.6±0.1          | 20.3±0.4         |
| –      | UBC2         | 1:40              | 21.2±0.1                        | 22.1±0.5         | 20.7±1.0          | 21.5±0.3         | 21.4±0.5          | 21.6±0.2         | 21.8±0.7          | 21.5±0.1         | 20.8±1.2          | 19.8±1.3         | 21.0±0.5          | 22.1±0.9         | 21.2±0.1          | 22.3±0.3         |
| –      | ACT11        | 1:80              | 20.6±0.4                        | 21.1±0.9         | 19.3±0.7          | 20.3±0.1         | 20.7±0.6          | 20.6±0.3         | 21.0±0.6          | 20.7±0.4         | 21.9±0.3          | 20.1±0.1         | 20.4±0.7          | 21.7±0.9         | 20.2±0.6          | 21.3±0.5         |
| –      | UBC2         | 1:80              | 23.2±0.2                        | 24.2±0.6         | 22.2±1.1          | 23.4±0.3         | 23.3±0.7          | 23.7±0.4         | 23.4±0.7          | 23.7±0.3         | 24.0±0.1          | 22.2±0.1         | 22.5±0.9          | 24.0±1.3         | 21.7±0.5          | 23.1±0.7         |

<sup>1</sup> Cycle threshold (C<sub>t</sub>) presented in the table was obtained by the average of all technical and biological RT-qPCR replicates ± standard error value.

<sup>2</sup> cDNA dilution.

<sup>3</sup> BR16 soybean cultivar.

<sup>4</sup> EMBRAPA48 soybean cultivar.

**Table S11.** Target and Endogenous Gene Cycle Threshold in Soybean Root Under Drought Stress – RT-qPCR<sup>1</sup>

| Symbol | Generic Name | c.D. <sup>2</sup> | Time of Drought Stress (minute) |                  |                   |                  |                   |                  |                   |                  |                   |                  |                   |                  |                   |                  |
|--------|--------------|-------------------|---------------------------------|------------------|-------------------|------------------|-------------------|------------------|-------------------|------------------|-------------------|------------------|-------------------|------------------|-------------------|------------------|
|        |              |                   | 0                               |                  | 25                |                  | 50                |                  | 75                |                  | 100               |                  | 125               |                  | 150               |                  |
|        |              |                   | BR16 <sup>3</sup>               | E48 <sup>4</sup> | BR16 <sup>3</sup> | E48 <sup>4</sup> | BR16 <sup>3</sup> | E48 <sup>4</sup> | BR16 <sup>3</sup> | E48 <sup>4</sup> | BR16 <sup>3</sup> | E48 <sup>4</sup> | BR16 <sup>3</sup> | E48 <sup>4</sup> | BR16 <sup>3</sup> | E48 <sup>4</sup> |
| ACO    | GmACO#012    | 1:80              | 23.3±0.1                        | 24.2±0.7         | 23.0±0.2          | 22.2±1.0         | 21.0±0.4          | 21.2±0.3         | 22.4±0.3          | 22.9±0.5         | 21.3±0.1          | 22.0±0.3         | 21.3±0.4          | 20.5±0.3         | 19.8±0.3          | 20.6±0.2         |
| ACS    | GmACS#006    | 1:40              | 30.5±0.3                        | 30.3±0.3         | 27.8±0.2          | 26.4±0.1         | 27.2±0.1          | 27.6±0.1         | 28.9±0.2          | 30.9±0.3         | 32.9±0.1          | 30.6±0.3         | 29.4±0.2          | 30.0±0.2         | 29.6±0.6          | 31.5±0.3         |
| CTR    | GmCTR#003    | 1:40              | 29.1±0.2                        | 28.1±0.1         | 30.0±0.3          | 29.5±0.1         | 30.9±0.2          | 30.7±0.3         | 31.8±0.1          | 30.9±0.4         | 33.3±0.2          | 31.4±0.4         | 31.7±0.3          | 31.9±0.4         | 32.1±0.4          | 32.0±0.1         |
| ETR    | GmETR#007    | 1:40              | 22.4±0.1                        | 21.5±0.1         | 23.6±0.1          | 25.5±0.1         | 25.3±0.1          | 23.1±0.1         | 23.7±0.1          | 23.6±0.1         | 28.7±0.1          | 24.9±0.1         | 23.7±0.1          | 23.4±0.1         | 24.0±0.1          | 25.7±0.1         |
| MAT    | GmMAT#008    | 1:80              | 20.0±0.1                        | 19.4±0.5         | 19.6±0.5          | 19.3±0.5         | 19.3±0.2          | 19.3±0.3         | 20.0±0.4          | 19.9±0.1         | 20.1±0.4          | 19.7±0.3         | 19.9±0.5          | 20.2±0.4         | 19.9±0.2          | 19.7±0.2         |
| –      | CYP2         | 1:40              | 19.1±0.1                        | 19.0±0.6         | 19.6±0.4          | 18.9±0.3         | 20.1±0.1          | 19.3±0.5         | 20.5±0.7          | 19.6±0.3         | 24.2±1.4          | 20.0±0.8         | 20.2±0.3          | 20.3±0.4         | 20.8±0.1          | 21.4±0.5         |
| –      | ELF1A        | 1:40              | 19.2±0.2                        | 19.1±0.7         | 19.7±0.3          | 19.1±0.4         | 19.9±0.1          | 19.9±0.6         | 21.1±0.7          | 20.3±0.2         | 23.9±0.9          | 21.1±0.6         | 21.3±0.2          | 21.4±0.4         | 22.3±0.2          | 22.5±0.4         |
| –      | CYP2         | 1:80              | 21.6±0.1                        | 20.4±0.1         | 21.7±0.3          | 21.3±0.3         | 22.1±0.3          | 21.3±0.5         | 21.8±0.2          | 22.3±0.5         | 23.0±0.5          | 21.7±0.2         | 21.4±0.8          | 22.2±0.4         | 22.0±0.4          | 21.5±1.1         |
| –      | ELF1A        | 1:80              | 22.5±0.1                        | 20.9±0.1         | 22.4±0.3          | 22.0±0.8         | 22.5±0.3          | 22.2±0.4         | 23.0±0.1          | 23.0±0.3         | 24.2±0.2          | 23.2±0.3         | 22.8±0.7          | 23.4±0.5         | 23.4±0.1          | 23.1±0.6         |

<sup>1</sup> Cycle threshold (C<sub>t</sub>) presented in the table was obtained by the average of all technical and biological RT-qPCR replicates ± standard error value.

<sup>2</sup> cDNA dilution.

<sup>3</sup> BR16 soybean cultivar.

<sup>4</sup> EMBRAPA48 soybean cultivar.
